# Supplementary material for: The involvement of physician assistants in inpatient care in hospitals in the Netherlands: a cost-effectiveness analysis
Source: PubMed Central journal article supplement — BMJ Open. 2017 Jul 10;7(7):e016405. doi: 10.1136/bmjopen-2017-016405 (PMC5541617; doi:10.1136/bmjopen-2017-016405), 2017-07-10
Supplement: bmjopen-2017-016405.draft_revisions.pdf [file bmjopen-2017-016405.draft_revisions.pdf]

# BMJ Open

## The implementation of physician assistants in inpatient care: a cost-effectiveness analysis

|                                 |                                                                                                                                                                                                                                                                                                                                                                                                                                                                                                                                                                                                       |
|---------------------------------|-------------------------------------------------------------------------------------------------------------------------------------------------------------------------------------------------------------------------------------------------------------------------------------------------------------------------------------------------------------------------------------------------------------------------------------------------------------------------------------------------------------------------------------------------------------------------------------------------------|
| Journal:                        | <i>BMJ Open</i>                                                                                                                                                                                                                                                                                                                                                                                                                                                                                                                                                                                       |
| Manuscript ID                   | bmjopen-2017-016405                                                                                                                                                                                                                                                                                                                                                                                                                                                                                                                                                                                   |
| Article Type:                   | Research                                                                                                                                                                                                                                                                                                                                                                                                                                                                                                                                                                                              |
| Date Submitted by the Author:   | 11-Feb-2017                                                                                                                                                                                                                                                                                                                                                                                                                                                                                                                                                                                           |
| Complete List of Authors:       | Timmermans, Marijke; Radboud university medical center, Radboud Institute for Health Sciences, IQ healthcare<br>van den Brink, Geert<br>van Vught, Anneke<br>Adang, Eddy<br>van Berlo, Charles<br>van Boxtel, Kim<br>Braunius, Weibel<br>Janssen, Loes<br>Venema, Alyssa<br>van den Wildenberg, Frits<br>Wensing, Michel; Radboud University Medical Centre, Scientific Institute for Quality of Healthcare<br>Laurant, Miranda; Radboud university medical center, Radboud Institute for Health Sciences, IQ healthcare; HAN University of Applied Sciences, Faculty of health, behavior and society |
| <b>Primary Subject Heading</b>: | Health services research                                                                                                                                                                                                                                                                                                                                                                                                                                                                                                                                                                              |
| Secondary Subject Heading:      | Health policy                                                                                                                                                                                                                                                                                                                                                                                                                                                                                                                                                                                         |
| Keywords:                       | Health & safety < HEALTH SERVICES ADMINISTRATION & MANAGEMENT, Quality in health care < HEALTH SERVICES ADMINISTRATION & MANAGEMENT, Organisation of health services < HEALTH SERVICES ADMINISTRATION & MANAGEMENT                                                                                                                                                                                                                                                                                                                                                                                    |
|                                 |                                                                                                                                                                                                                                                                                                                                                                                                                                                                                                                                                                                                       |

SCHOLARONE™  
Manuscripts

1  
2  
3 **1 The implementation of physician assistants in inpatient care: a cost-effectiveness**  
4  
5 **2 analysis**  
6  
7  
8  
9

10 4 Marijke J.C. Timmermans<sup>1,2</sup>, Geert T. van den Brink<sup>2</sup>, Anneke J.A.H. van Vught<sup>2</sup>, Eddy  
11 5 Adang<sup>3</sup>, Charles L.H. van Berlo<sup>4</sup>, Kim van Boxtel<sup>5</sup>, Weibel W. Braunius<sup>6,7</sup>, Loes Janssen<sup>8</sup>,  
12 6 Alyssa Venema<sup>9</sup>, Frits J. van den Wildenberg<sup>10</sup>, Michel Wensing<sup>1,11</sup>, Miranda G.H. Laurant<sup>1,2</sup>  
13  
14  
15  
16  
17

18 8 **1.** Radboud university medical center, Radboud Institute for Health Sciences, Scientific  
19 Center for Quality of Healthcare (IQ healthcare), Nijmegen, The Netherlands  
20  
21

22 10 **2.** HAN University of Applied Sciences, Faculty of Health and Social Studies, Nijmegen,  
23 The Netherlands  
24  
25  
26

27 12 **3.** Radboud university medical center, Radboud Institute for Health Sciences, Department  
28 of Health Evidence, Nijmegen, The Netherlands  
29  
30

31 14 **4.** VieCuri Medical Center Noord-Limburg, Department of Surgery Venlo, The  
32 Netherlands  
33  
34  
35

36 16 **5.** Jeroen Bosch Hospital, Department of Gastroenterology, Den Bosch, The Netherlands  
37

38 17 **6.** UMC Cancer Center, University Medical Center Utrecht, Department of Head and Neck  
39 Surgical Oncology, Utrecht, The Netherlands  
40  
41

42 19 **7.** University Medical Center Utrecht, Department of Otorhinolaryngology, Utrecht, The  
43 Netherlands  
44  
45  
46

47 21 **8.** VieCuri Medical Center Noord-Limburg, Department of Orthopaedics, Venlo, The  
48 Netherlands  
49  
50

51 23 **9.** Elisabeth-Tweesteden Hospital, Department of Surgery, Tilburg, The Netherlands  
52

53 24 **10.** Canisius Wilhelmina Hospital, Department of Surgery, Nijmegen, the Netherlands.  
54  
55  
56  
57  
58  
59  
60

1  
2  
3 25 11. Heidelberg University Hospital, Department of General Practice and Health Services  
4  
5 26 Research, Heidelberg, Germany.  
6  
7  
8  
9

10 28 **Address for correspondence:**

11 29 Marijke J.C. Timmermans, MSc  
12  
13 30 Radboud university medical center  
14  
15 31 Radboud Institute for Health Sciences,  
16  
17 32 114 IQ healthcare  
18  
19 33 P.O. Box 9101  
20  
21 34 6500 HB Nijmegen, The Netherlands  
22  
23 35 Tel: 0031 24 3615305  
24  
25 36 Fax: not applicable  
26  
27 37 Marijke.Timmermans@radboudumc.nl  
28  
29  
30  
31  
32  
33

34 39 **Running title:** Physician assistants in inpatient care  
35

36 40 **Word count:** 3465  
37

38 41 **Number of tables:** 4  
39

40 42 **Number of figures:** 1  
41  
42  
43  
44  
45  
46  
47  
48  
49  
50  
51  
52  
53  
54  
55  
56  
57  
58  
59  
60

1  
2  
3 43 **ABSTRACT**

4  
5 44 **Objective.** To investigate the cost-effectiveness of substitution of inpatient care from medical  
6  
7 45 doctors (MDs) to physician assistants (PAs).

8  
9  
10 46 **Design.** Cost-effectiveness analysis embedded within a multicenter matched-controlled study.  
11  
12 47 The traditional model in which only MDs are employed for inpatient care (MD model) was  
13  
14 48 compared with a mixed model in which besides MDs also PAs are employed (PA/MD  
15  
16 49 model).

17  
18  
19 50 **Setting:** 34 hospital wards across the Netherlands

20  
21 51 **Participants.** 2292 patients were followed from admission till 1 month after discharge.  
22  
23 52 Patients receiving daycare, terminally ill patients and children were excluded.

24  
25 53 **Primary and secondary outcome measures.** All direct healthcare costs from day of  
26  
27 54 admission until one month after discharge. Health outcome concerned quality-adjusted life  
28  
29 55 years.

30  
31  
32 56 **Results.** We found no significant difference for QALY gain (+0.02, 95% CI -0.01-0.05)  
33  
34 57 when comparing the PA/MD model with the MD model. Total costs per patient did not  
35  
36 58 significantly differ between the groups (+ € 568, 95% CI €-254-€1391, p=0.175). Regarding  
37  
38 59 the costs per item, a difference of 309 euro per patient (95% CI €29-€588, p=0.030) was  
39  
40 60 found in favor of the MD model regarding length of stay. Personnel costs per patient for the  
41  
42 61 provider who is primarily responsible for medical care at the ward, was lower on the wards in  
43  
44 62 the PA/MD model (€-11, 95% CI €-16- €-6, p=0.000).

45  
46  
47 63 **Conclusions.** This study suggests that the cost-effectiveness on wards managed by PAs is  
48  
49 64 similar to the care on wards with traditional house staffing. The implementation of PAs may  
50  
51 65 reduce personnel costs, but not overall healthcare costs.

52  
53  
54  
55  
56  
57 67 **Trial registration:** ClinicalTrials.gov Identifier: [NCT01835444](https://clinicaltrials.gov/ct2/show/study/NCT01835444), April 2013  
58  
59  
60

1  
2  
3 68

4  
5 69 **Key words:** Professional role revision, substitution, physician assistant, hospital care,  
6  
7 70 resource use, costs

8  
9  
10 71

11  
12 72 **Strengths and limitations of this study**

13  
14 73 • This study increases the understanding of the implications of reallocating inpatient  
15  
16 74 care from MDs to PAs on total healthcare costs, as well as on resources uses.

17  
18  
19 75

20  
21 76 • This study captured a large number of patients from 34 hospital wards, which cover  
22  
23 77 both teaching and non-teaching hospitals and six different medical disciplines

24  
25  
26 78

27  
28 79 • The non-randomized character of this study implies an increased risk for confounding,  
29  
30 80 which we accounted for in the multivariable analyses and subgroup analyses.

31  
32  
33 81

34 82 • Although we performed subgroup analyses, we cannot exclude that local differences  
35  
36 83 like policies about quality of care and patient case-mix influence the results.

37  
38  
39  
40  
41  
42  
43  
44  
45  
46  
47  
48  
49  
50  
51  
52  
53  
54  
55  
56  
57  
58  
59  
60

1  
2  
3 84 **BACKGROUND**  
4

5 85 Because of an increased appreciation of continuity of care, pressure to deliver healthcare  
6  
7 86 efficiently, and local shortages of medical doctors (MDs), medical care for admitted patients  
8  
9 87 is increasingly reallocated to physician assistants (PAs).<sup>1-3</sup> A PA is a health professional  
10  
11 88 licensed to practice medicine in defined domains, with variable degrees of professional  
12  
13 89 autonomy.<sup>4</sup> PAs who provide medical care for admitted patients usually work in a team  
14  
15 90 comprising both PAs and MDs (i.e. residents, medical specialists or hospitalists).  
16  
17  
18  
19

20  
21 92 Literature suggests that PAs add to the quality of care by increasing continuity for both  
22  
23 93 patients and hospital staff.<sup>1</sup> The turnover of house staff is traditionally high due to use of  
24  
25 94 recent medical graduates who are planning to do fellowships and the mandatory rotational  
26  
27 95 cycles. PAs generally do not rotate and constitute a factor of stability in the continually  
28  
29 96 changing medical workforce. Previous studies show that quality of care for admitted patients  
30  
31 97 delivered by a PA-based team is comparable to that of a resident-based team, and that patient  
32  
33 98 evaluations are at least as good.<sup>5-10</sup> Our own study showed similar quality and safety of care,  
34  
35 99 but better patients experiences on wards with a PA-based team.<sup>11</sup> Estimates of PA  
36  
37 100 employment on costs vary across the conducted studies.<sup>5,6,10</sup> These studies concerned one  
38  
39 101 clinical discipline within one hospital, which reduces the generalizability of findings. Given  
40  
41 102 the outcomes of these studies and their limitations, we conducted a multicenter study that  
42  
43 103 included PAs providing care to hospitalized patients including a range of clinical disciplines.  
44  
45  
46  
47 104 This paper reports on the cost-effectiveness of substitution of inpatient care from MDs to  
48  
49 105 PAs.  
50  
51  
52  
53  
54  
55  
56  
57  
58  
59  
60

1  
2  
3 106  
4

5 107 **METHODS**  
6

7 108 **Study design**  
8

9  
10 109 This economic evaluation was performed alongside a multicenter non-randomized matched-  
11 110 controlled study, which was performed in the Netherlands. In this study, the care on wards  
12 111 utilizing a mixed 'PA/MD model' (intervention group) was compared with the care on wards  
13 112 utilizing a solely 'MD model' (control group).  
14  
15  
16  
17  
18

19 113

20 114 *MD model*  
21

22  
23 115 In the MD model, only MDs are in charge of the admitted patients at a specific hospital  
24 116 department. Most of them are residents. The resident is physically present at the department  
25 117 each weekday and is the first point of access to medical care during office hours (MR model).  
26 118 Their work includes daily clinical care and patient management. The residents are supervised  
27 119 by medical specialists. In some cases, especially in smaller hospitals where often no residents  
28 120 are employed, the medical specialists provide all medical care for the admitted patients (MS  
29 121 model).  
30  
31  
32  
33  
34  
35  
36  
37  
38  
39

40 122

41 123 *PA/MD model*  
42

43 124 In this model, the PAs who were employed at the wards are substitutes for the residents.  
44 125 Their tasks and responsibilities are largely comparable. PAs have the same authorizations as  
45 126 residents: they can make indications for treatment, perform predefined medical procedures  
46 127 and subscribe medication independently within their field of expertise.<sup>12</sup> We included two  
47 128 different models within the intervention group: a model in which PAs collaborate with  
48 129 residents (mixed PA/MR model) and a model in which only PAs are the first point of access  
49  
50  
51  
52  
53  
54  
55  
56  
57  
58  
59  
60

1  
2  
3 130 to medical care (PA model). In both models, the PAs as well as the residents were supervised  
4  
5 131 by medical specialists.  
6

7 132  
8

9  
10 133 Control wards were matched with the intervention wards on the basis of medical specialty  
11  
12 134 and hospital type. Hospital wards were included in the intervention group if the PA covered  
13  
14 135 at least 51% of the available ward care hours per week during dayshifts on weekdays. Wards  
15  
16 136 were included in the control group if exclusively MDs provided medical care. The primary  
17  
18 137 analysis had patients' length of stay as primary outcome. Further details of the study design  
19  
20  
21 138 have been described elsewhere.<sup>13</sup> The economic analysis was conducted from a healthcare  
22  
23 139 perspective, with a time frame from admission till one month after discharge.  
24

25 140  
26

### 27 141 **Study population**

28  
29  
30 142 This study focused on the patients admitted to the hospital wards. Exclusion criteria for  
31  
32 143 patients were: 1) Younger than 18 years; 2) Terminally ill; and 3) Receiving daycare.  
33  
34 144 Daycare was defined as hospital admissions that were intended to last 24 hours or less.  
35

36 145  
37

### 38 146 **Health outcome**

39  
40  
41 147 The primary health outcome in this evaluation is the QALY (quality-adjusted life years). A  
42  
43 148 QALY is a generic measure of disease burden.<sup>14</sup> QALYs were derived using the EuroQoL-  
44  
45 149 5D questionnaire (EQ-5D-3L)<sup>15</sup>, which is a widely used validated patient questionnaire  
46  
47 150 comprising five domains: mobility, self-care, usual activities, pain, and anxiety/depression.  
48  
49 151 Each domain has three possible levels indicating; no problems, moderate problems or severe  
50  
51 152 problems. The EQ-5D-3L was assessed at three time points: at admission, discharge and one  
52  
53 153 month after discharge. We used the Dutch utility weight to calculate utilities.<sup>16</sup>  
54  
55

56 154  
57  
58  
59  
60



1  
2  
3 155 **Cost outcomes**  
4

5 156 The primary cost outcome was the sum of direct costs associated with the principal admission  
6  
7 157 and costs that occurred within one month after discharge that were potentially related to  
8  
9 158 hospital admission. Resources used during admission were extracted in detail at an individual  
10  
11 159 patient level from patient medical records and included laboratory tests, diagnostic tests,  
12  
13 160 medication and blood products. Also the frequency and type of consultations of health care  
14  
15 161 suppliers and the number of days of unplanned stay at ICU were derived from the medical  
16  
17 162 records. To minimize information bias, a random sample of 10% of the patient records per  
18  
19 163 ward was reassessed by a second researcher, who was blinded for the results from the initial  
20  
21 164 researcher. In case of an inter-rater agreement of less than 95%, the records of the total  
22  
23 165 sample were reassessed.  
24  
25  
26

27 166

28  
29 167 Personnel costs included the costs for the residents, PAs and medical specialist who were  
30  
31 168 primarily employed for medical care for the admitted patients. Also the costs for supervision  
32  
33 169 time were included. We measured the number of hours spend for medical ward care per  
34  
35 170 professional by examination of work schedules. All MDs and PAs who had the primary task  
36  
37 171 to provide medical care for admitted patients were asked to fill in their real work schedule  
38  
39 172 during four fixed weeks: week 3, 7, 11 and 15 after the start of the inclusion of patients. Next,  
40  
41 173 we divided the number of working hours by the number of patients for which they were in  
42  
43 174 charge. The number of hours spent for supervision was derived from an online questionnaire.  
44  
45 175 We asked each attending physician for the average number of hours they weekly spend for  
46  
47 176 supervision. These hours were added up for all attending physicians of the department, and  
48  
49 177 divided by the number of patients who were admitted at the ward.  
50  
51  
52

53 178  
54  
55  
56  
57  
58  
59  
60

1  
2  
3 179 Volumes which were measured between discharge and one month afterwards included days  
4  
5 180 of unplanned readmission, number of presentations at emergency departments, number of  
6  
7 181 contacts with a general practitioner, and the required home care. These volumes were  
8  
9  
10 182 collected from a patient questionnaire that was sent one month after discharge. Costs were  
11  
12 183 calculated by multiplying the volumes of healthcare use with corresponding unit prices,  
13  
14 184 derived from the Dutch Manual for Costing Research.<sup>17</sup> All figures were related to the price  
15  
16 185 level of the same year (i.e. 2014). Details of the costs applied to units of resource use are  
17  
18 186 provided in supplementary table S1.  
19  
20  
21  
22

187

### 188 **Sample size calculation**

189 Sample size calculation was based on length of stay (LOS), which was the primary clinical  
190 outcome of the multicenter study. Results for LOS have been published elsewhere.<sup>11</sup> The  
191 originally published sample size calculation<sup>13</sup> was adjusted prior to start of data collection.<sup>18</sup>  
192 To detect a relative difference in LOS of 20% between the 'PA/MD model' and 'MD model',  
193 assuming an average LOS of 6 days (SD 4.9), alpha 5%, power 80% and an Intra Cluster  
194 Coefficient of 0.06 for patients in same ward, 30 wards including 100 patients each were  
195 required. Taking into account an expected drop-out of maximum 2 matched pairs, 34 wards  
196 (17 in each arm) with each 100 patients were required. In case of no drop-out, 50 patients per  
197 ward would be sufficient.  
198

199

### 200 **Data analysis**

201 We used descriptive analyses with counts (and proportions) or means (with SDs) to describe  
202 baseline characteristics, effects, and costs. The a priori planned analysis was a comparison  
203 between the intervention and control group on incremental costs and incremental effects. The  
incremental effects were analyzed using a linear mixed model approach with the QALY score

1  
2  
3 204 as dependent variable and group and baseline QALY as independent variables, taking  
4  
5 205 clustering of patients within wards into account. If similar effects on the QALY in both  
6  
7 206 groups were found, a cost-minimization approach was performed by comparing differences in  
8  
9  
10 207 costs between groups using a linear mixed model approach accounting for clustering and  
11  
12 208 applying bootstrapping (200 times) to create bias-corrected 95% CIs around the coefficients  
13  
14 209 of the independent variables. A total of 50–200 replications are generally adequate for  
15  
16 210 estimates of standard error.<sup>19</sup> Multivariable models were constructed to adjust for potential  
17  
18 211 confounders. We took matching into account by adding covariables for the matching  
19  
20  
21 212 variables.

22  
23 213  
24  
25 214 Missing data were imputed via multiple imputations. To explore uncertainty around costing  
26  
27 215 assumptions (i.e. cost-prices and salary), sensitivity analysis was conducted on the range of  
28  
29 216 extremes. Imputation models for all cost categories and utility scores were then redone  
30  
31 217 accounting for changes in the sensitivity analysis. To explore heterogeneity within the results,  
32  
33 218 post-hoc subgroup analyses were performed for each submodel of medical ward care: the MS  
34  
35 219 model, MR model, mixed PA/MR model and the PA model. All analyses were carried out  
36  
37 220 with Stata 11.2 (StataCorp, College Station, TX). P-value was set at 0.05 to indicate  
38  
39 221 statistical significance.  
40  
41  
42  
43 222

### 44 45 223 **Ethical considerations**

46  
47 224 Ethical approval was received from the Research Ethics Committee of the Radboud  
48  
49 225 university medical center, Nijmegen (registration number: 2012/306); the committee judged  
50  
51 226 that ethical approval was not required under Dutch Law. All data were handled strictly  
52  
53 227 confidential and written informed consent was obtained from all patients.  
54  
55  
56  
57 228

1  
2  
3 229 **RESULTS**

4  
5 230 Between April 2013 and May 2015 we included 1,021 patients spread over 17 hospital wards  
6  
7 231 in the intervention group, and 1,286 patients spread over 17 hospital wards in the control  
8  
9 232 group. More patients in the intervention group were acutely admitted (59% versus 44% in the  
10  
11 233 control group,  $p < .001$ ). Also medical specialty, hospital type, primary diagnosis and  
12  
13 234 discharge destination differed significantly between the groups (table 1).  
14

15  
16 235

17  
18  
19 236 **Health outcomes**

20  
21 237 We had complete QALY data for 779 patients in the intervention group (76%) and 982  
22  
23 238 patients in the control group (76%). Utilities related to the three time points and QALYs are  
24  
25 239 outlined in table 2. The EQ-5D utilities did not statistically significantly differ between the  
26  
27 240 study arms at baseline and throughout the study. At discharge and one month after discharge  
28  
29 241 the mean difference in EQ-5D utility was -0.01 (95% CI -0.06-0.04,  $p=0.634$ ) respectively -  
30  
31 242 0.04 (95% CI -0.09-0.02,  $p=0.178$ ), corrected for baseline utility. Similarly, the difference in  
32  
33 243 QALY gain was not statistically significant during admission nor after discharge.  
34

35  
36 244

37  
38  
39 245 **Resource use and costs**

40  
41 246 Ninety-nine percent of all patient records were assessed. Item-missing varied from 2%  
42  
43 247 (unplanned transfer to ICU) to 9% (use of blood products). Resource use after discharge was  
44  
45 248 derived from the questionnaire which was send to the patient one month after discharge. The  
46  
47 249 response rate on this questionnaire was 76% in both study arms. Resources used during the  
48  
49 250 period from admission till one month after discharge are summarized in supplemental table 2.  
50

51  
52 251

53  
54 252 Table 3 outlines total costs per patient and costs per item. Mean total costs per patient in the  
55  
56 253 intervention group did not significantly differ from the mean costs per patient in the control  
57  
58  
59  
60

1  
2  
3 254 group: mean difference was €568 (95% CI €-254-€1391,  $p=0.175$ ). Regarding the costs per  
4  
5 255 item, we found significant differences of €309 per patient (95% CI €29-€588,  $p=0.030$ )  
6  
7 256 regarding LOS in favor of the MD model. Personnel costs for the PA or MD who is primarily  
8  
9  
10 257 responsible for the medical care at the ward was significantly lower on the wards in the  
11  
12 258 PA/MD model: mean difference €-11 (95% CI €-16- €-6,  $p=0.000$ ) per patient. Costs for  
13  
14 259 supervision by the staff physicians were significantly higher in the PA/MD model: mean  
15  
16 260 difference €43 (95% CI €39-€47,  $p=0.000$ ). Since the MD model also incorporates wards  
17  
18 261 with only medical specialists, supervision is not applicable for these wards. To rule out this  
19  
20  
21 262 distortion we performed an additional analysis in which we excluded the 4 wards with only  
22  
23 263 medical specialists. This resulted in an opposite difference: costs for supervision were now  
24  
25 264 significantly lower for the PA/MD model compared to the MD models: mean difference € -11  
26  
27 265 (€-16- €-6,  $p=0.000$ ).

28  
29  
30 266 Sensitivity analyses on the range of extremes did not change these results of the total costs  
31  
32 267 and costs per item substantially (data not shown, but can be provided on request).

33  
34 268

### 35 36 269 **Subgroup analyses**

37  
38 270 Results for the analyses per submodel of medical ward care are shown in table 4. Mean total  
39  
40 271 costs per patient did not significantly differ among the submodels. Costs for LOS were on  
41  
42 272 average 465 euro per patient (95% CI -920- -10,  $P=0.045$ ) lower in the MS model than in the  
43  
44 273 mixed PA/MR model. The other models did not significantly differ from each other.  
45  
46 274 Personnel costs for the provider who is primarily responsible for the medical care at the ward  
47  
48 275 was significantly highest in the MS model (mean €129 (€37)), and lowest in the PA model  
49  
50 276 (mean €51 (€3)). Costs for supervision were significantly highest in the MR model (mean  
51  
52 277 €178 (€79)) and lowest in the PA model (mean €121 (€59)). We also found significant  
53  
54  
55  
56  
57  
58  
59  
60

1  
2  
3 278 differences regarding costs for blood products and required home care: these were highest in  
4  
5 279 the PA model.

6  
7 280

8  
9 281 **DISCUSSION**

10 282 This study aimed to determine the cost-effectiveness of substitution of inpatient care from  
11  
12 283 MDs to PAs. No significant difference between the two study arms was found on QALY and  
13  
14 284 total costs. Explorative analyses showed a significant difference in costs for LOS in favor of  
15  
16 285 the MD model, and significant differences regarding personnel costs in favor of the PA/MD  
17  
18 286 model.

19  
20  
21 287

22  
23  
24  
25 288 To our knowledge, this is the first multicenter study that investigated the cost implications of  
26  
27 289 reallocating inpatient care from MDs to PAs. A few single-centered studies have compared  
28  
29 290 costs of non-acute inpatient care delivered by a PA-based team with care delivered by a  
30  
31 291 resident-based team.<sup>5,6,10</sup> These studies did not measure QALYs. Results regarding total  
32  
33 292 costs were mixed. Roy et al.<sup>5</sup> reported that the care by the PA-based team was associated with  
34  
35 293 lower total costs per patient, while Ianuzzi et al.<sup>10</sup> reported an association with higher costs.  
36  
37 294 Singh et al.<sup>6</sup> reported similar costs between the study arms. These studies can however hardly  
38  
39 295 be compared with our study, because different methods to estimate costs were used and the  
40  
41 296 settings were different. In addition, most of these studies compared a hospitalist/PA model  
42  
43 297 with the traditional resident-based model, while hospitalists were not part of the models we  
44  
45 298 used.<sup>20</sup>

46  
47  
48 299

49  
50  
51 300 Our previous analysis showed increased provider continuity at the ward with the presence of  
52  
53 301 a PA.<sup>20</sup> This study shows that this increased continuity did not cause a decrease in costs,  
54  
55 302 especially because of the higher costs for LOS. Subgroup analysis showed that costs for LOS  
56  
57  
58  
59  
60

1  
2  
3 303 were especially higher when compared to the model in which only medical specialists were  
4  
5 304 involved. Costs did not significantly differ between the PA models and the model which  
6  
7 305 involves only residents. An explanation for the lower costs for LOS in the MS model might  
8  
9  
10 306 be that the medical specialists have more work experience. The PA profession is relatively  
11  
12 307 new; most of them have a short time of experience compared to medical specialists.<sup>20</sup> Over  
13  
14 308 time the clinical experience of PAs will become larger, which may lead to lower costs.  
15  
16 309 Besides, we cannot exclude the possibility that the lower LOS indicates that the patients  
17  
18 310 which were included in the MS model were overall less complex than the patients in the other  
19  
20 311 models. Although we've adjusted for relevant confounders in the multivariable analysis, it is  
21  
22 312 not possible to perfectly adjust for the complexity of the patient in non-randomized  
23  
24 313 comparisons.  
25  
26  
27  
28  
29

30 315 Personnel costs for the provider who is primarily responsible for the medical care at the ward  
31  
32 316 were significantly lower on the wards with the PA/MD model when compared to the MD  
33  
34 317 model. Subgroup analysis showed highest costs on the wards with only medical specialists.  
35  
36 318 This can be explained by the significant higher salary. Besides, we found lower costs on  
37  
38 319 wards with the PA model when compared to the model which involves only residents. Since  
39  
40 320 the salary of PAs is comparable to the salary of residents (table S1), the significant difference  
41  
42 321 can be explained by our finding that on the wards with the PA/MD model, less time was  
43  
44 322 spend per patient (table S2). This is probably caused by the finding of our previous study that  
45  
46 323 PAs spend less time on indirect inpatient care than residents do.<sup>20</sup> A hypothesis is that since  
47  
48 324 PAs tend to work for a longer time at the hospital ward, they might be more familiar with the  
49  
50 325 clinical protocols and the procedures, for example when requesting diagnostic tests and  
51  
52 326 consultation of other physicians. Also the increased provider continuity might lead to more  
53  
54 327 efficient care.<sup>20</sup>  
55  
56  
57  
58  
59  
60

328

329 In our initial analysis, costs for supervision were significantly higher in the PA/MD model  
330 when compared to the MD model. However, this finding was biased by the wards with only  
331 medical specialists, since supervision was not applicable for these wards. Costs for  
332 supervision were higher on the wards with the mixed PA/MR model and the MR model when  
333 compared to the PA model. An explanation might be the fact that the PAs in the PA model  
334 have more work experience than the PAs and residents in the other models.<sup>21</sup> An alternative  
335 hypothesis is that the difference is caused by the teaching culture of the wards. 83% of all  
336 included wards with a mixed PA/MR model and 69% of all wards with the MR model are  
337 from teaching centers, while none of the wards with the PA model are.<sup>20</sup> As a consequence,  
338 there might be more consultation between professionals and more emphasize on education,  
339 which could be included in the supervision hours.

340

341 This study suggests that the cost-effectiveness of inpatient care delivered by a PA-based team  
342 is comparable to that of residents-based teams. This does not confirm the findings from  
343 qualitative studies, in which medical specialists experienced an increased efficiency after  
344 employing PAs.<sup>21-23</sup> However, the effectiveness which was experienced by the interviewed  
345 providers in our own qualitative study was based on items which were not in the scope of this  
346 quantitative research.<sup>22</sup> Several interviewees experienced increased effectiveness because the  
347 PA performs additional tasks which were normally the responsibility of the staff physicians  
348 or residents, like integrating newly employed doctors, performing specific (complex) medical  
349 procedures, providing education or conducting quality projects. As a consequence, staff  
350 physicians and residents can be employed more effective in for example providing outpatient  
351 care or conducting surgery. Besides, residents experience increased effectiveness because  
352 they have more time to focus on the needs for their own education.



1  
2  
3 353  
4

5 354 This economic evaluation was conducted from a health care perspective. The societal  
6  
7 355 perspective was not taken into account. For example, educational costs for PA students are  
8  
9 356 thought to be lower than educational costs for medical students, since the vocational training  
10  
11 357 programs take 2.5 and 6 years respectively. Exact costs for training PA students are however  
12  
13 358 hard to determine, because Dutch PA students have already obtained a healthcare related  
14  
15 359 Bachelor's degree of 4 years and have at least 2 years of clinical work experience in the  
16  
17 360 healthcare domain.<sup>24</sup> Besides, since the PA education is a shortened form of the traditional  
18  
19 361 medical education, it is thought that policy makers can respond quicker on the frequently  
20  
21 362 changing demand for medical professionals within healthcare organizations. Another value  
22  
23 363 from the social perspective might be that becoming a PA is an interesting opportunity for  
24  
25 364 nurses and other health care providers wanting to advance their career.<sup>25,26</sup> As a consequence,  
26  
27 365 motivated employees can be saved for the healthcare workforce.  
28  
29  
30  
31

32 366

33  
34 367 Several strengths and limitations have to be mentioned. A strength is the multicenter design,  
35  
36 368 which increases the generalizability of our findings. We included a broad range of clinical  
37  
38 369 disciplines from different types of hospitals. A limitation is the non-randomized design.  
39  
40 370 Different from other countries, the Dutch PA programs incorporate a dual work-education  
41  
42 371 model, which means that students are employed within a particular medical specialty from  
43  
44 372 the day of their enrollment in the master's PA program.<sup>24,27</sup> After graduation, the majority  
45  
46 373 continue their employment at the same department. The suggestion of randomly relocating  
47  
48 374 the graduated PA to another hospital ward could lead to resistance among the staff physicians  
49  
50 375 who put considerable effort in the training. The non-randomized character of this study does  
51  
52 376 imply an increased risk for confounding, which we accounted for in the multivariable  
53  
54 377 analyses. Besides, we tried to reduce heterogeneity within our data by conducting subgroup  
55  
56  
57  
58  
59  
60

1  
2  
3 378 analyses for the four models for medical ward care separately. However, we cannot exclude  
4  
5 379 that there are still local differences like policies about quality of care and patient case-mix  
6  
7 380 which still influence our results. Besides, the results of the subgroup analyses should be  
8  
9 381 interpreted with caution because of low numbers of patients per subgroup.  
10

11 382

12  
13  
14 383 **Conclusion**

15  
16 384 This study suggests that the cost-effectiveness on wards managed by PAs is similar to the  
17  
18 385 care on wards with traditional house staffing by MDs. The implementation of PAs may  
19  
20 386 reduce personnel costs, but not overall healthcare costs.  
21  
22  
23  
24  
25  
26  
27  
28  
29  
30  
31  
32  
33  
34  
35  
36  
37  
38  
39  
40  
41  
42  
43  
44  
45  
46  
47  
48  
49  
50  
51  
52  
53  
54  
55  
56  
57  
58  
59  
60

1  
2  
3 387 **Funding statement**  
4

5 388 This work was funded by the Netherlands Organization for Health Research and  
6  
7 389 Development (ZonMw), grant number 171202006  
8

9  
10 390

11 391 **Competing interest**  
12

13  
14 392 The authors declare that they have no competing interest  
15

16 393  
17

18 394 **Data sharing statement**  
19

20 395 Data files are available from the authors on reasonable request.  
21

22 396  
23

24 397 **Author's contributions**  
25

26  
27 398 ML and MT are responsible for the design of the study with comments of AvV, MW, EA and  
28  
29 399 GvdB. MT is responsible for the data collection and data management with direct supervision  
30  
31 400 and feedback from ML. MT and EA conducted the data analyses. CvB, KvB, WB, LJ, AV  
32  
33 401 and FvdW were involved in the data collection of the study. MT wrote the first draft of the  
34  
35 402 manuscript and all other authors reviewed this critically. All authors read and approved the  
36  
37 403 final manuscript.  
38  
39

40 404  
41

42 405 **Acknowledgments**  
43

44  
45 406 We thank all professionals of the 34 Dutch hospital wards for participating in the study:  
46  
47 407 Bravis Hospital, Department of Orthopaedics; Canisius Wilhelmina Hospital, Department of  
48  
49 408 Surgery; Canisius Wilhelmina Hospital, Department of Gastroenterology; De Tjongerschans  
50  
51 409 Hospital, Department of Surgery; Elisabeth Hospital, Department of Surgery; Elkerliek  
52  
53 410 Hospital, Department of Surgery; Elkerliek Hospital, Department of Cardiology; Gelre  
54  
55 411 Hospital, Department of Pulmonology; Haga Hospital, Department of Surgery; Hospital  
56  
57  
58  
59  
60

1  
2  
3 412 Gelderse Vallei, Department of Surgery; Jeroen Bosch Hospital, Department of Surgery;  
4  
5 413 Jeroen Bosch Hospital, Department of Gastroenterology; Koningin Beatrix Hospital,  
6  
7 414 Department of Surgery; Laurentius Hospital, Department of Surgery; Laurentius Hospital,  
8  
9 415 Department of Gastroenterology; Medical Center Haaglanden, Department of Surgery; Orbis  
10  
11 416 Medical Center, Department of Surgery; Radboud university medical center, Department of  
12  
13 417 ENT, Head and Neck Surgical Oncology; Reinier de Graaf Gasthuis, Department of Surgery;  
14  
15 418 Rijnstate Hospital, Department of Gastroenterology; Scheper Hospital, Department of  
16  
17 419 Surgery; Slingeland Hospital, Department of Surgery; TweeSteden Hospital, Department of  
18  
19 420 Pulmonology; Van Weel Bethesda Hospital, Department of Surgery; UMC Cancer Center,  
20  
21 421 University Medical Center Utrecht, Department of Head and Neck Surgical Oncology;  
22  
23 422 VieCuri Medical Center Noord-Limburg, Department of Surgery; VieCuri Medical Center  
24  
25 423 Noord-Limburg, Department of Cardiology; VieCuri Medical Center Noord-Limburg,  
26  
27 424 Department of Pulmonology; VieCuri Medical Center Noord-Limburg, Department of  
28  
29 425 Orthopaedics.  
30  
31  
32  
33  
34 426 Second, we thank Irma Maassen and Yvonne Peters (research assistants, Radboud university  
35  
36 427 medical center, Scientific Center for Quality of healthcare) for executing many logistical  
37  
38 428 procedures. Third, we thank Reinier Akkermans (Radboud university medical center,  
39  
40 429 Scientific Center for Quality of healthcare), statistical expert, for his advice in data analysis.  
41  
42  
43 430  
44  
45  
46  
47  
48  
49  
50  
51  
52  
53  
54  
55  
56  
57  
58  
59  
60

431 **REFERENCES**

- 432 **1.** Ford WT, Britting LL. Nonphysician providers in the hospitalist model: a prescription  
433 for change and a warning about unintended side effects. *J Hosp Med.* 2010;5(2):99-  
434 102.
- 435 **2.** Hartsell Z. The emerging role of PAs in the hospitalist movement. *JAAPA.*  
436 2007;20(8):10.
- 437 **3.** Mittman DE, Cawley JF, Fenn WH. Physician assistants in the United States. *BMJ.*  
438 2002;325(7362):485-487.
- 439 **4.** Merkle F, Ritsema TS, Bauer S, et al. The physician assistant: Shifting the Paradigm  
440 of European medical practice? *HSR Proc Intensive Care Cardiovasc Anesth.*  
441 2011;3(4):255-262.
- 442 **5.** Roy CL, Liang CL, Lund M, et al. Implementation of a physician assistant/hospitalist  
443 service in an academic medical center: impact on efficiency and patient outcomes. *J*  
444 *Hosp Med.* 2008;3(5):361-368.
- 445 **6.** Singh S, Fletcher KE, Schapira MM, et al. A comparison of outcomes of general  
446 medical inpatient care provided by a hospitalist-physician assistant model vs a  
447 traditional resident-based model. *J Hosp Med.* 2011;6(3):122-130.
- 448 **7.** Dhuper S, Choksi S. Replacing an academic internal medicine residency program  
449 with a physician assistant--hospitalist model: a comparative analysis study. *Am J Med*  
450 *Qual.* 2009;24(2):132-139.
- 451 **8.** Nishimura RA, Linderbaum JA, Naessens JM, et al. A nonresident cardiovascular  
452 inpatient service improves residents' experiences in an academic medical center: a  
453 new model to meet the challenges of the new millennium. *Acad Med.*  
454 2004;79(5):426-431.

- 1  
2  
3 455 **9.** Miller W, Riehl E, Napier M, et al. Use of physician assistants as surgery/trauma  
4  
5 456 house staff at an American College of Surgeons-verified Level II trauma center. *J*  
6  
7 457 *Trauma*. 1998;44(2):372-376.  
8  
9  
10 458 **10.** Iannuzzi MC, Iannuzzi JC, Holtsbery A, et al. Comparing Hospitalist-Resident to  
11  
12 459 Hospitalist-Midlevel Practitioner Team Performance on Length of Stay and Direct  
13  
14 460 Patient Care Cost. *J Grad Med Educ*. 2015;7(1):65-69.  
15  
16 461 **11.** Timmermans MJC, Van Vught AJAH, Peters YAS, et al. The impact of the  
17  
18 462 implementation of physician assistants in inpatient care: a multicenter matched-  
19  
20 463 controlled study. *Submitted at PLoS ONE*.  
21  
22  
23 464 **12.** De Bruijn-Geraets DP, Van Eijk-Hustings YJ, Vrijhoef HJ. Evaluating newly  
24  
25 465 acquired authority of nurse practitioners and physician assistants for reserved medical  
26  
27 466 procedures in the Netherlands: a study protocol. *J Adv Nurs*. 2014;70(11):2673-2682.  
28  
29  
30 467 **13.** Timmermans MJ, van Vught AJ, Wensing M, et al. The effectiveness of substitution  
31  
32 468 of hospital ward care from medical doctors to physician assistants: a study protocol.  
33  
34 469 *BMC Health Serv Res*. 2014;14:43.  
35  
36 470 **14.** Drummond MF, Sculpher MJ, Torrance GW, O'Brien BJ, Stoddart GL (2005)  
37  
38 471 *Methods for the economic evaluation of health care programmes*. (Third ed.) Oxford  
39  
40 472 University Press.  
41  
42  
43 473 **15.** EuroQol G. EuroQol--a new facility for the measurement of health-related quality of  
44  
45 474 life. *Health Policy*. 1990;16(3):199-208.  
46  
47  
48 475 **16.** Lamers LM, Stalmeier PF, McDonnell J, et al. [Measuring the quality of life in  
49  
50 476 economic evaluations: the Dutch EQ-5D tariff]. *Ned Tijdschr Geneesk*.  
51  
52 477 2005;149(28):1574-1578.  
53  
54  
55  
56  
57  
58  
59  
60

- 1  
2  
3 478 **17.** Hakkaer- van Roijen L, Tan S, Bouwmans CAM: Handleiding voor  
4  
5 479 Kostenonderzoek. Methoden en standaard kostprijzen voor economische evaluaties in  
6  
7 480 de gezondheidszorg. In. Rotterdam: Health care Insurance Council; 2015.  
8  
9  
10 481 **18.** Timmermans MJ, van Vught AJ, Wensing M, et al. Erratum to: The effectiveness of  
11  
12 482 substitution of hospital ward care from medical doctors to physician assistants: a  
13  
14 483 study protocol. *BMC Health Serv Res.* 2016;16(1):115.  
15  
16 484 **19.** Mooney CZ, Duval RD. Bootstrapping: A Nonparametric Approach to Statistical  
17  
18 485 Inference. London: SAGE Publications. 1993.  
19  
20  
21 486 **20.** Timmermans MJ, van Vught AJ, Van den Berg M, et al. Physician assistants in  
22  
23 487 medical ward care: a descriptive study of the situation in the Netherlands. *J Eval Clin*  
24  
25 488 *Pract.* 2015.  
26  
27 489 **21.** Taylor MT, Wayne Taylor D, Burrows K, et al. Qualitative study of employment of  
28  
29 490 physician assistants by physicians: benefits and barriers in the Ontario health care  
30  
31 491 system. *Can Fam Physician.* 2013;59(11):e507-513.  
32  
33  
34 492 **22.** Timmermans MJ, van Vught AJ, Maassen IT, et al. Determinants of the sustained  
35  
36 493 employment of physician assistants in hospitals: a qualitative study. *BMJ Open.*  
37  
38 494 2016;6(11):e011949.  
39  
40  
41 495 **23.** White H, Round JE. Introducing physician assistants into an intensive care unit:  
42  
43 496 process, problems, impact and recommendations. *Clin Med (Lond).* 2013;13(1):15-  
44  
45 497 18.  
46  
47 498 **24.** Spenkeliink-Schut G, Ten Cate OTJ, Kort HSM. Training the physician assistant in the  
48  
49 499 Netherlands. *J Physician Assist Educ.* 2008;19(4):46-53.  
50  
51  
52 500 **25.** Niezen MG, Mathijssen JJ. Reframing professional boundaries in healthcare: a  
53  
54 501 systematic review of facilitators and barriers to task reallocation from the domain of  
55  
56 502 medicine to the nursing domain. *Health Policy.* 2014;117(2):151-169.  
57  
58  
59  
60

- 1  
2  
3 503 **26.** Zwijnenberg NC, Bours GJ. Nurse practitioners and physician assistants in Dutch  
4  
5 504 hospitals: their role, extent of substitution and facilitators and barriers experienced in  
6  
7 505 the reallocation of tasks. *J Adv Nurs*. 2012;68(6):1235-1246.  
8  
9  
10 506 **27.** Hooker RS, Kuilman L. Physician assistant education: five countries. *J Physician*  
11  
12 507 *Assist Educ*. 2011;22(1):53-58.  
13  
14 508  
15  
16 509  
17  
18  
19  
20  
21  
22  
23  
24  
25  
26  
27  
28  
29  
30  
31  
32  
33  
34  
35  
36  
37  
38  
39  
40  
41  
42  
43  
44  
45  
46  
47  
48  
49  
50  
51  
52  
53  
54  
55  
56  
57  
58  
59  
60

For peer review only



## 510 TABLES

511

512 Table 1. Baseline characteristics of patients

| Baseline characteristic                                       | PA/MD model (n=1021) | MD model (n=1286) | P Value |
|---------------------------------------------------------------|----------------------|-------------------|---------|
| Medical specialty <i>n</i> (%)                                |                      |                   | <.001   |
| Surgery                                                       | 601 (59%)            | 696 (54%)         |         |
| Gastroenterology                                              | 102 (10%)            | 181 (14%)         |         |
| Pulmonology                                                   | 91 (9%)              | 107 (8%)          |         |
| Cardiology                                                    | 101 (10%)            | 124 (10%)         |         |
| Orthopaedics                                                  | 103 (10%)            | 100 (8%)          |         |
| ENT, head and neck oncology surgery                           | 23 (2%)              | 78 (6%)           |         |
| Hospital type <i>n</i> (%)                                    |                      |                   | <.001   |
| Teaching                                                      | 552 (54%)            | 709 (55%)         |         |
| Academic                                                      | 23 (2%)              | 78 (6%)           |         |
| Non-academic                                                  | 529 (52%)            | 631 (49%)         |         |
| Non-teaching                                                  | 469(46%)             | 577 (45%)         |         |
| Gender, male <i>n</i> (%)                                     | 524 (53%)            | 682 (54%)         | .47     |
| Age, years <i>mean</i> ± <i>SD</i>                            | 64 ± 16              | 63 ± 15           | .11     |
| Major diagnoses <i>n</i> (%)                                  |                      |                   | <.001   |
| Digestive system                                              | 204 (20%)            | 247 (19%)         |         |
| Circulatory system                                            | 158 (16%)            | 274 (22%)         |         |
| Neoplasms                                                     | 108 (11%)            | 195 (15%)         |         |
| Musculoskeletal system and connective tissue                  | 120 (12%)            | 119 (9%)          |         |
| Injury and poisoning                                          | 135 (13%)            | 80 (6%)           |         |
| Infectious and parasitic diseases                             | 59 (6%)              | 81 (6%)           |         |
| Respiratory system                                            | 51 (5%)              | 75 (6%)           |         |
| Symptoms                                                      | 61 (6%)              | 87 (7%)           |         |
| Charlson index for co-morbidity score <i>mean</i> ± <i>SD</i> | 1.1 ± 1.8 (43%)      | 1.1 ± 1.8 (44%)   | .65     |
| (% with score ≥1)                                             |                      |                   | .66     |
| Highest education <i>n</i> (%)                                |                      |                   | .15     |
| Low                                                           | 371 (38%)            | 422 (34%)         |         |
| Middle                                                        | 380 (39%)            | 489 (40%)         |         |
| High                                                          | 233 (24%)            | 328 (27%)         |         |
| Ethnicity, Dutch <i>n</i> (%)                                 | 976(99%)             | 1212 (98%)        | .15     |
| Marital status <i>n</i> (%)                                   |                      |                   | .29     |
| No partner                                                    | 136 (14%)            | 167 (14%)         |         |
| Partner                                                       | 730 (74%)            | 949 (77%)         |         |
| Widow                                                         | 119 (12%)            | 125 (10%)         |         |
| Smoking status <i>n</i> (%)                                   |                      |                   | .65     |
| No, never smoked                                              | 325 (33%)            | 385 (31%)         |         |
| No, but ever smoked                                           | 494 (48%)            | 626 (50%)         |         |
| Yes, still smoking                                            | 174 (17%)            | 230 (19%)         |         |
| Body Mass Index ( <i>mean</i> ± <i>SD</i> )                   | 27 ± 5               | 27 ± 5            | .79     |
| Number of hospitalizations for same problem <i>n</i> (%)      |                      |                   | .20     |
| 1 hospitalization                                             | 580 (59%)            | 693 (56%)         |         |
| >1 hospitalization                                            | 403 (41%)            | 540 (44%)         |         |
| Type of admission <i>n</i> (%)                                |                      |                   | <.001   |
| Elective                                                      | 402 (41%)            | 687 (56%)         |         |
| Urgent                                                        | 588 (59%)            | 547 (44%)         |         |
| Discharge destination <i>n</i> (%)                            |                      |                   | <.001   |
| Home                                                          | 765 (90%)            | 965 (92%)         |         |
| Hospital                                                      | 12 (1%)              | 30 (3%)           |         |

1  
2  
3  
4  
5  
6  
7  
8  
9  
10  
11  
12  
13  
14  
15  
16  
17  
18  
19  
20  
21  
22  
23  
24  
25  
26  
27  
28  
29  
30  
31  
32  
33  
34  
35  
36  
37  
38  
39  
40  
41  
42  
43  
44  
45  
46  
47  
48  
49  
50  
51  
52  
53  
54  
55  
56  
57  
58  
59  
60

|                                            |         |         |
|--------------------------------------------|---------|---------|
| Nursing home/rehabilitation center/hospice | 56 (7%) | 28 (3%) |
| Family relative                            | 18 (2%) | 25 (2%) |

---

Note: Numbers may not add up to the total because of missing values

513

For peer review only

514 Table 2. Utilities at admission, discharge and one month after discharge, and QALY gained

| Outcome                            | PA/MD model (n=1,015)<br>mean (SD)* | MD model (n=1,277)<br>mean (SD)* | Difference<br>mean (95% CI) | P Value |
|------------------------------------|-------------------------------------|----------------------------------|-----------------------------|---------|
| <b>EQ-5D</b>                       |                                     |                                  |                             |         |
| Baseline (admission)               | 0.64 (0.28)                         | 0.68 (0.29)                      | -0.04 (-0.12-0.03)          | 0.247   |
| Discharge                          | 0.71 (0.22)                         | 0.72 (0.23)                      | -0.01 (-0.06-0.04)          | 0.634   |
| One month after discharge          | 0.75 (0.23)                         | 0.78 (0.22)                      | -0.04 (-0.09-0.02)          | 0.178   |
| <b>QALY gain during admission</b>  | 0.07 (0.25)                         | 0.04 (0.25)                      | 0.03 (-0.02-0.08)           | 0.213   |
| <b>QALY gain after discharge**</b> | 0.04 (0.22)                         | 0.05 (0.21)                      | -0.02 (-0.07-0.02)          | 0.216   |

\*Values are summary estimates obtained by multiple imputation

515 \*\*Difference in QALY between 1 month after discharge and discharge, adjusted for baseline utility

516

517

518

519 Table 3. Total costs per patient and costs per item (€)

| Item                                                     | PA/MD model (n=1015)<br>mean (SD)* | MD model (n=1277)<br>mean (SD)* | Difference **<br>mean (95% CI) | P Value      |
|----------------------------------------------------------|------------------------------------|---------------------------------|--------------------------------|--------------|
| <b>Costs associated with principal admission</b>         |                                    |                                 |                                |              |
| Length of stay                                           | 1780 (1811)                        | 1421 (1210)                     | 309 (29-588)                   | 0.030        |
| Non-elective transfer to ICU                             | 333 (3267)                         | 182 (1761)                      | 105 (-262-473)                 | 0.575        |
| <b>Resources used during admission</b>                   |                                    |                                 |                                |              |
| Medication                                               | 344 (848)                          | 243 (748)                       | 99 (-9- 207)                   | 0.073        |
| Laboratory tests                                         | 107 (168)                          | 99 (136)                        | 19 (-16-44)                    | 0.366        |
| Diagnostic tests                                         | 163 (229)                          | 154 (235)                       | -1 (-44-42)                    | 0.970        |
| Blood products                                           | 31 (122)                           | 36 (117)                        | -12 (-37-14)                   | 0.371        |
| <b>Consultation with health care suppliers</b>           |                                    |                                 |                                |              |
| Medical or surgical consultant                           | 30 (93)                            | 19 (47)                         | 4 (-6-13)                      | 0.437        |
| Paramedics and specialist nurses                         | 96 (159)                           | 73 (121)                        | 14 (-20- 48)                   | 0.429        |
| <b>Personnel</b>                                         |                                    |                                 |                                |              |
| PA/MD who is primarily responsible for medical care      | 71 (29)                            | 103 (44)                        | -31 (-33- -28)                 | 0.000        |
| Supervision by staff physician                           | 156 (93)                           | 129 (104)                       | 43 (39- 47)                    | 0.000        |
| <i>Exclusion of wards with staff physicians only</i>     | 156 (93)                           | 173 (77)                        | -11 (-16- -6)                  | 0.000        |
| <b>Costs occurred during first month after discharge</b> |                                    |                                 |                                |              |
| Presentation at emergency department                     | 108 (182)                          | 114 (298)                       | -13 (-45-20)                   | 0.448        |
| Non-elective readmission                                 | 456 (1333)                         | 421 (1142)                      | 1 (-89-92)                     | 0.977        |
| Contact with general practitioner                        | 55 (73)                            | 53 (70)                         | 0 (-7-7)                       | 0.923        |
| Required home care                                       | 121 (248)                          | 98 (214)                        | 11 (-9-30)                     | 0.275        |
| <b>Total costs</b>                                       | <b>3480 (5196)</b>                 | <b>2869 (3260)</b>              | <b>568 (-254-1391)</b>         | <b>0.175</b> |

Abbreviations: PA = physician assistant; MD=medical doctor

\*Values are summary estimates obtained by multiple imputation

520 \*\*Difference in mean costs per patient in the PA/MD group minus the MD group with bootstrapped 95% CI, adjusted for

521 medical specialty, hospital type, diagnosis, comorbidities, type of admission, discharge destination

522

523

524 Table 4. Costs (€) per patient per submodel of medical ward care

| Item                                                     | PA/MD model (n=1015) |                   | MD model (n=1277) |                   | P Value **                                                                                                                                                           |
|----------------------------------------------------------|----------------------|-------------------|-------------------|-------------------|----------------------------------------------------------------------------------------------------------------------------------------------------------------------|
|                                                          | PA/MR model (n=698)  | PA model (n=317)  | MR model (n=924)  | MS model (n= 353) |                                                                                                                                                                      |
|                                                          | <i>mean (SD)*</i>    | <i>mean (SD)*</i> | <i>mean (SD)*</i> | <i>mean (SD)*</i> | 1= PA/MR model<br>2=PA model<br>3= MR model<br>4= MS model                                                                                                           |
| <b>Costs associated with principal admission</b>         |                      |                   |                   |                   |                                                                                                                                                                      |
| Length of stay at the ward                               | 1921 (1949)          | 1469 (1413)       | 1557 (1335)       | 1064 (675)        | 1 vs 4: <i>P</i> = 0.045                                                                                                                                             |
| Non-elective transfer to ICU                             | 468 (3935)           | 45 (494)          | 249 (2072)        | 17 (322)          | NS                                                                                                                                                                   |
| Resources use during admission                           |                      |                   |                   |                   |                                                                                                                                                                      |
| Medication                                               | 365 (943)            | 297 (600)         | 280 (869)         | 130 (194)         | NS                                                                                                                                                                   |
| Laboratory tests                                         | 116 (167)            | 85 (170)          | 114 (149)         | 58 (78)           | NS                                                                                                                                                                   |
| Diagnostic tests                                         | 202 (253)            | 73 (121)          | 152 (249)         | 155 (195)         | NS                                                                                                                                                                   |
| Blood products                                           | 16 (89)              | 61 (171)          | 33 (130)          | 42 (71)           | 1 vs 2: <i>P</i> = 0.001<br>3 vs 2: <i>P</i> = 0.006                                                                                                                 |
| Consultation with health care suppliers                  |                      |                   |                   |                   |                                                                                                                                                                      |
| Medical or surgical consultant                           | 35 (108)             | 18 (41)           | 21 (50)           | 11 (30)           | NS                                                                                                                                                                   |
| Paramedics and specialized nurses                        | 97 (175)             | 94 (120)          | 72 (130)          | 73 (90)           | NS                                                                                                                                                                   |
| Personnel                                                |                      |                   |                   |                   |                                                                                                                                                                      |
| PA/MD who is primarily responsible for medical care      | 80 (31)              | 51 (3)            | 93 (42)           | 129 (37)          | 1 vs 4: <i>P</i> = 0.000<br>2 vs 4: <i>P</i> = 0.000<br>3 vs 4: <i>P</i> = 0.006<br>1 vs 3: <i>P</i> = 0.000<br>2 vs 3: <i>P</i> = 0.000<br>2 vs 1: <i>P</i> = 0.008 |
| Supervision by staff physician                           | 173 (100)            | 121 (59)          | 178 (79)          | NA                | 1 vs 3: <i>P</i> = 0.019<br>2 vs 3: <i>P</i> = 0.000<br>2 vs 1: <i>P</i> = 0.000                                                                                     |
| <b>Costs occurred during first month after discharge</b> |                      |                   |                   |                   |                                                                                                                                                                      |
| Presentation at emergency department                     | 112 (182)            | 101 (182)         | 125 (296)         | 88 (307)          | NS                                                                                                                                                                   |
| Non-elective readmission                                 | 455 (1176)           | 467 (1647)        | 438 (1054)        | 388 (13564)       | NS                                                                                                                                                                   |
| Contact with general practitioner                        | 57 (75)              | 53 (69)           | 54 (72)           | 51 (67)           | NS                                                                                                                                                                   |
| Required home care                                       | 109 (222)            | 150 (298)         | 104 (229)         | 86 (174)          | 2 vs 1: <i>P</i> = 0.029<br>2 vs 3: <i>P</i> = 0.031<br>2 vs 4: <i>P</i> = 0.025                                                                                     |
| <b>Total costs</b>                                       | 3807 (5997)          | 2754 (2536)       | 3154 (3625)       | 2120 (1809)       | NS                                                                                                                                                                   |

Abbreviations: PA = physician assistant; MR=medical resident; MS=medical specialist; NS= not significant; NA= not applicable

\*Values are summary estimates obtained by multiple imputation

\*\*Only significant p-values are noted

525

526

1 **FIGURES**

2 Figure 1. Flow-chart of patients

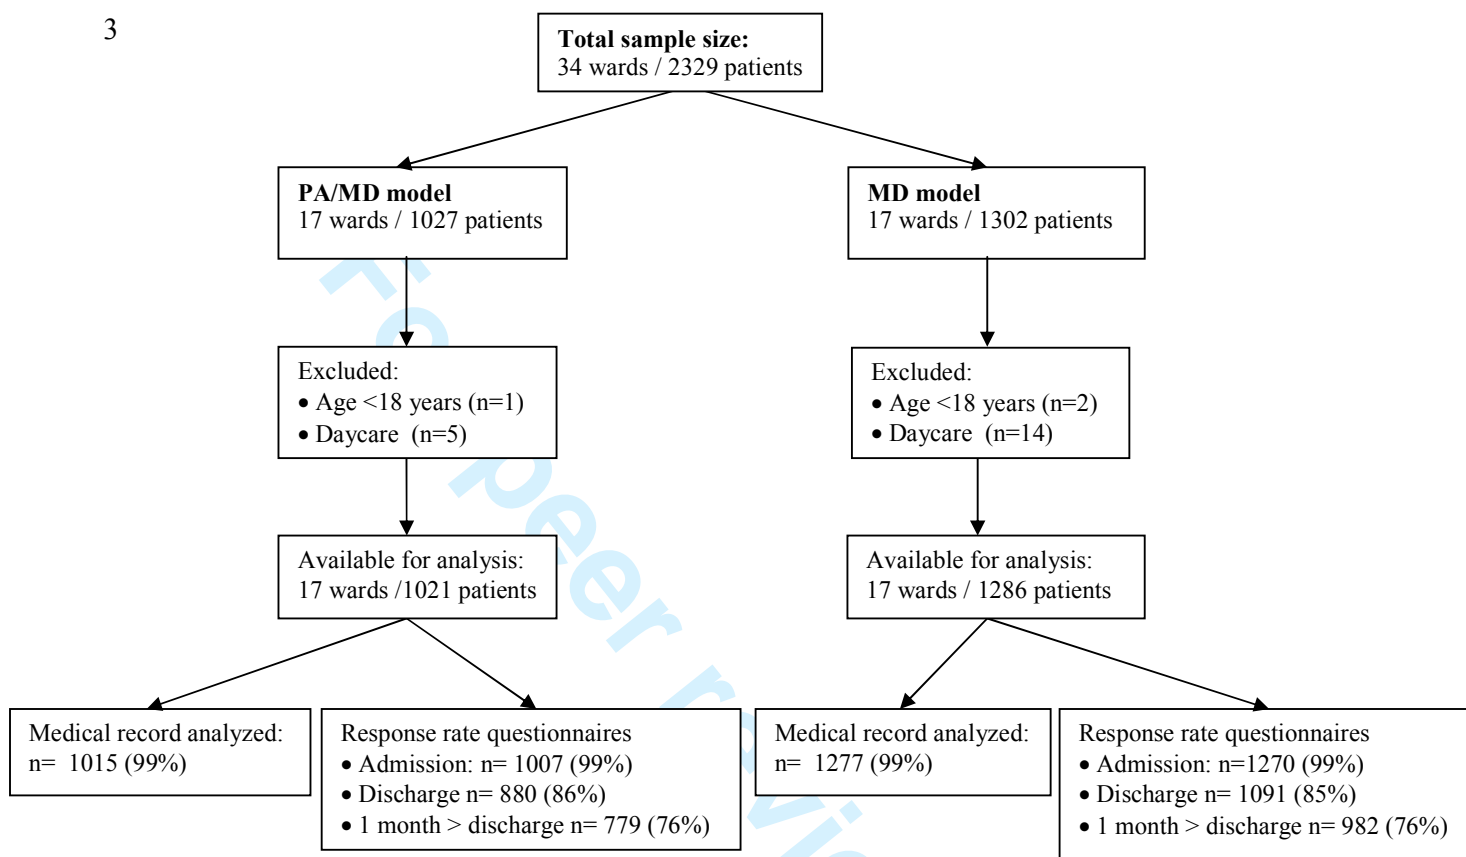

Table S1. Details of the unit costs (year 2014) assigned to health care resource use data

| Health care use                                | Unit cost | Unit              | Details                                                                                           | Source                                                 |
|------------------------------------------------|-----------|-------------------|---------------------------------------------------------------------------------------------------|--------------------------------------------------------|
| <i>Admissions</i>                              |           |                   |                                                                                                   |                                                        |
| Ward                                           | €210      | Per day           | Average price, including overhead costs, but not personnel costs and costs regarding resource use | Dutch manual for costing <sup>1</sup>                  |
| Intensive care unit                            | €2015     | per day           | Average price per day including all costs: personnel, resource use, overhead                      | Dutch manual for costing <sup>1</sup>                  |
| <i>Resource use during admission</i>           |           |                   |                                                                                                   |                                                        |
| Medication                                     | Variable  | Per unit          | Minimum and maximum cost price, variable per type and dose of medicine                            | www.medicijnkosten.nl                                  |
| Laboratory tests                               | €1.77     | Per test          | Average price per laboratory test                                                                 | Dutch manual for costing <sup>1</sup>                  |
| Investigations. For example:                   | Variable  | Per investigation | Variable per type of investigation                                                                | The Dutch Healthcare Authority (NZa) <sup>2</sup>      |
| X-ray of the thorax                            | €55,81    | Per x-ray         | Fixed price established by the NZa                                                                | The Dutch Healthcare Authority (NZa) <sup>2</sup>      |
| CT scan of the abdomen                         | €234,57   | Per scan          | Fixed price established by the NZa                                                                | The Dutch Healthcare Authority (NZa) <sup>2</sup>      |
| MRI Cerebrum                                   | €253.89   | Per MRI           | Fixed price established by the NZa                                                                | The Dutch Healthcare Authority (NZa) <sup>2</sup>      |
| DEXA scan                                      | €109.09   | Per scan          | Fixed price established by the NZa                                                                | The Dutch Healthcare Authority (NZa) <sup>2</sup>      |
| <i>Blood products</i>                          |           |                   |                                                                                                   |                                                        |
| Erythrocytes                                   | €216      | Per unit (280 ml) | Fixed price, established by Sanquin Blood Supply                                                  | Dutch manual for costing <sup>1</sup>                  |
| Trombocytes                                    | €522      | Per unit (330 ml) | Fixed price, established by Sanquin Blood Supply                                                  | Dutch manual for costing <sup>1</sup>                  |
| Plasma                                         | €186      | Per unit (310 ml) | Fixed price, established by Sanquin Blood Supply                                                  | Dutch manual for costing <sup>1</sup>                  |
| <i>Consultation with health care suppliers</i> |           |                   |                                                                                                   |                                                        |
| Medical or surgical consultant                 | €27       | per consult       | Based on an assumed session time of 12 minutes                                                    | Dutch manual for costing <sup>1</sup>                  |
| Physiotherapist                                | €33       | per consult       | Based on an assumed session time of 30 minutes                                                    | Dutch manual for costing <sup>1</sup>                  |
| Occupation therapist                           | €33       | per consult       | Based on an assumed session time of 30 minutes                                                    | Dutch manual for costing <sup>1</sup>                  |
| Dietician                                      | €27       | per consult       | Based on an assumed session time of 30 minutes                                                    | Dutch manual for costing <sup>1</sup>                  |
| Speech therapist                               | €30       | per consult       | Based on an assumed session time of 30 minutes                                                    | Dutch manual for costing <sup>1</sup>                  |
| Social worker                                  | €30       | per consult       | Based on an assumed session time of 30 minutes                                                    | Financial department Radboud university medical center |
| Specialized nurse                              | €30,5     | per consult       | Based on an assumed session time of 30 minutes                                                    | Dutch manual for costing <sup>1</sup>                  |
| Psychologist                                   | €64       | per consult       | Based on an assumed session time of 60 minutes                                                    | Dutch manual for costing <sup>1</sup>                  |
| <i>Personnel</i>                               |           |                   |                                                                                                   |                                                        |

| PA/MD who is primarily responsible for medical care at the ward |        |             |                                                                                                                             |                                       |
|-----------------------------------------------------------------|--------|-------------|-----------------------------------------------------------------------------------------------------------------------------|---------------------------------------|
| Resident                                                        | €36.24 | per hour    | Based on a contract of 46 hours per week (including time for education) , a salary of €4365 and 39% addition for honorarium | Dutch manual for costing <sup>1</sup> |
| Physician Assistant                                             | €39.82 | per hour    | Based on a contract of 36 hours per week, a salary of €3719 and 39% addition for honorarium                                 | Dutch manual for costing <sup>1</sup> |
| Staff physician                                                 | €116   | per hour    | Based on an average salary, including honorariums                                                                           | Dutch manual for costing <sup>1</sup> |
| Supervision by staff physician                                  | €116   | per hour    | Based on an average salary, including honorariums                                                                           | Dutch manual for costing <sup>1</sup> |
| <i>Resource use during first month after discharge</i>          |        |             |                                                                                                                             |                                       |
| Visit to emergency department                                   | €259   | per visit   | Average price per visit                                                                                                     | Dutch manual for costing <sup>1</sup> |
| Readmission                                                     | €476   | per day     | Average price including all costs, independent of type of medical specialty                                                 | Dutch manual for costing <sup>1</sup> |
| Contact with GP                                                 |        |             |                                                                                                                             |                                       |
| GP surgery visit                                                | €33    | per consult | Based on a consult time of maximum 20 minutes                                                                               | Dutch manual for costing <sup>1</sup> |
| GP home visit                                                   | €50    | per consult | Based on a consult time of maximum 20 minutes                                                                               | Dutch manual for costing <sup>1</sup> |
| Phoned GP for advice                                            | €17    | per consult | Based on a consult time of maximum 10 minutes                                                                               | Dutch manual for costing <sup>1</sup> |
| Consult at GP cooperative                                       | €87.41 | per consult | Average price per visit                                                                                                     | The Dutch Healthcare Authority (NZa)  |
| Required home care                                              |        |             |                                                                                                                             |                                       |
| Nursing home care                                               | €73    | per hour    | Average price per hour                                                                                                      | Dutch manual for costing <sup>1</sup> |
| Domestic home care                                              | €23    | per hour    | Average price per hour                                                                                                      | Dutch manual for costing <sup>1</sup> |

Abbreviations: GP = General Practitioner

1. Hakkaer- van Roijen L, Tan S, Bouwmans CAM: Handleiding voor Kostenonderzoek. Methoden en standaard kostprijzen voor economische evaluaties in de gezondheidszorg. In. Rotterdam: Health care Insurance Council; 2015

2. <http://dbc-zorgproducten-tarieven.nza.nl/nzaZpTarief/ZoekfunctieDot.aspx>

Table S2. Resources use during admission and one month after discharge

| Item                                                                                       | PA/MD model<br>(n=1015) | MD model<br>(n=1277) |
|--------------------------------------------------------------------------------------------|-------------------------|----------------------|
| <b>Admission</b>                                                                           |                         |                      |
| Length of stay<br><i>Days, median (IQR)</i>                                                | 6 (4-10)                | 5 (4-8)              |
| Non-elective transfer to ICU<br><i>Days, median (IQR)</i>                                  | 0 (1-2)                 | 0 (1-1)              |
| <i>n/N (%)</i>                                                                             | 19/987 (2%)             | 23/1242 (2%)         |
| <b>Resources use during admission</b>                                                      |                         |                      |
| Medication                                                                                 | Variable                | Variable             |
| Laboratory tests<br><i>Number of items analyzed, median (IQR)</i>                          | 31 (8-66)               | 34 (8-71)            |
| <i>n/N (%)</i>                                                                             | 870/954 (91%)           | 1130/1254 (90%)      |
| Diagnostic investigations<br><i>number of investigations, median (IQR)</i>                 | 1 (0-3)                 | 1 (0-2)              |
| <i>n/N (%)</i>                                                                             | 692/932 (74%)           | 711/1143 (62%)       |
| Blood components<br><i>number of blood components, median (IQR)</i>                        | 0 (0-0)                 | 0 (0-0)              |
| <i>n/N (%)</i>                                                                             | 64/998 (6%)             | 54/1097 (5%)         |
| <b>Consultation with health care suppliers during admission</b>                            |                         |                      |
| Medical or surgical consultant<br><i>number of consultation, median (IQR)</i>              | 0 (0-1)                 | 0 (0-0)              |
| <i>n/N (%)</i>                                                                             | 281/912 (31%)           | 297/1256 (24%)       |
| Paramedics and specialist nurses<br><i>number of consultation, median (IQR)</i>            | 1 (0-4)                 | 0 (0-2)              |
| <i>n/N (%)</i>                                                                             | 554/953 (58%)           | 612/1246 (49%)       |
| <b>Personnel</b>                                                                           |                         |                      |
| PA/MD who is primarily responsible for medical care at the ward<br><i>hours, mean (SD)</i> | 1.80 (0.93)             | 1.98 (1.60)          |
| Supervision by staff physician<br><i>hours, mean (SD)</i>                                  | 1.34 (0.80)             | 1.11 (0.90)          |
| <i>Exclusion of wards with staff physicians only</i>                                       | 1.34 (0.80)             | 1.53 (0.68)          |
| <b>Resources use during first month after admission</b>                                    |                         |                      |
| Presentation at emergency department<br><i>number of presentations</i>                     | 0 (0-0)                 | 0 (0-0)              |
| <i>n/N (%)</i>                                                                             | 119/743 (16%)           | 169/941 (18%)        |
| Non-elective readmission<br><i>Days, median (IQR)</i>                                      | 0 (0-0)                 | 0 (0-0)              |
| <i>n/N (%)</i>                                                                             | 66/738 (9%)             | 77/935 (8%)          |
| Contact with general practitioner<br><i>number of contacts</i>                             | 1 (0-2)                 | 1 (0-2)              |
| <i>n/N (%)</i>                                                                             | 214/577 (54%)           | 394/702 (56%)        |
| Required nursing home care<br><i>Hours, median (IQR)</i>                                   | 0 (0-1)                 | 0 (0-0)              |
| <i>n/N (%)</i>                                                                             | 97/589 (16%)            | 91/713 (13%)         |
| Required domestic home care<br><i>Hours, median (IQR)</i>                                  | 0 (0-0)                 | 0 (0-0)              |
| <i>n/N (%)</i>                                                                             | 118/741 (16%)           | 169/941 (18%)        |



**STROBE 2007 (v4) checklist of items to be included in reports of observational studies in epidemiology\***  
**Checklist for cohort, case-control, and cross-sectional studies (combined)**

| Section/Topic             | Item # | Recommendation                                                                                                                                                                                                                                                                                                                                                                                                                                                         | Reported on page # |
|---------------------------|--------|------------------------------------------------------------------------------------------------------------------------------------------------------------------------------------------------------------------------------------------------------------------------------------------------------------------------------------------------------------------------------------------------------------------------------------------------------------------------|--------------------|
| Title and abstract        | 1      | (a) Indicate the study's design with a commonly used term in the title or the abstract                                                                                                                                                                                                                                                                                                                                                                                 | 1                  |
|                           |        | (b) Provide in the abstract an informative and balanced summary of what was done and what was found                                                                                                                                                                                                                                                                                                                                                                    | 3                  |
| <b>Introduction</b>       |        |                                                                                                                                                                                                                                                                                                                                                                                                                                                                        |                    |
| Background/rationale      | 2      | Explain the scientific background and rationale for the investigation being reported                                                                                                                                                                                                                                                                                                                                                                                   | 5                  |
| Objectives                | 3      | State specific objectives, including any pre-specified hypotheses                                                                                                                                                                                                                                                                                                                                                                                                      | 5                  |
| <b>Methods</b>            |        |                                                                                                                                                                                                                                                                                                                                                                                                                                                                        |                    |
| Study design              | 4      | Present key elements of study design early in the paper                                                                                                                                                                                                                                                                                                                                                                                                                | 6                  |
| Setting                   | 5      | Describe the setting, locations, and relevant dates, including periods of recruitment, exposure, follow-up, and data collection                                                                                                                                                                                                                                                                                                                                        | 6-9                |
| Participants              | 6      | (a) <i>Cohort study</i> —Give the eligibility criteria, and the sources and methods of selection of participants. Describe methods of follow-up<br><i>Case-control study</i> —Give the eligibility criteria, and the sources and methods of case ascertainment and control selection. Give the rationale for the choice of cases and controls<br><i>Cross-sectional study</i> —Give the eligibility criteria, and the sources and methods of selection of participants | 6-7                |
|                           |        | (b) <i>Cohort study</i> —For matched studies, give matching criteria and number of exposed and unexposed<br><i>Case-control study</i> —For matched studies, give matching criteria and the number of controls per case                                                                                                                                                                                                                                                 | 7                  |
| Variables                 | 7      | Clearly define all outcomes, exposures, predictors, potential confounders, and effect modifiers. Give diagnostic criteria, if applicable                                                                                                                                                                                                                                                                                                                               | 7-9                |
| Data sources/ measurement | 8*     | For each variable of interest, give sources of data and details of methods of assessment (measurement). Describe comparability of assessment methods if there is more than one group                                                                                                                                                                                                                                                                                   | 7-9                |
| Bias                      | 9      | Describe any efforts to address potential sources of bias                                                                                                                                                                                                                                                                                                                                                                                                              | 6-10               |
| Study size                | 10     | Explain how the study size was arrived at                                                                                                                                                                                                                                                                                                                                                                                                                              | 9                  |
| Quantitative variables    | 11     | Explain how quantitative variables were handled in the analyses. If applicable, describe which groupings were chosen and why                                                                                                                                                                                                                                                                                                                                           | 9-10               |
| Statistical methods       | 12     | (a) Describe all statistical methods, including those used to control for confounding                                                                                                                                                                                                                                                                                                                                                                                  | 9-10               |
|                           |        | (b) Describe any methods used to examine subgroups and interactions                                                                                                                                                                                                                                                                                                                                                                                                    | 10                 |
|                           |        | (c) Explain how missing data were addressed                                                                                                                                                                                                                                                                                                                                                                                                                            | 10                 |
|                           |        | (d) <i>Cohort study</i> —If applicable, explain how loss to follow-up was addressed<br><i>Case-control study</i> —If applicable, explain how matching of cases and controls was addressed                                                                                                                                                                                                                                                                              | 10                 |

|                          |     |                                                                                                                                                                                                              |                             |
|--------------------------|-----|--------------------------------------------------------------------------------------------------------------------------------------------------------------------------------------------------------------|-----------------------------|
|                          |     | <i>Cross-sectional study</i> —If applicable, describe analytical methods taking account of sampling strategy                                                                                                 |                             |
|                          |     | (e) Describe any sensitivity analyses                                                                                                                                                                        |                             |
| <b>Results</b>           |     |                                                                                                                                                                                                              |                             |
| Participants             | 13* | (a) Report numbers of individuals at each stage of study—eg numbers potentially eligible, examined for eligibility, confirmed eligible, included in the study, completing follow-up, and analysed            | 11<br>Figure 1              |
|                          |     | (b) Give reasons for non-participation at each stage                                                                                                                                                         | NA                          |
|                          |     | (c) Consider use of a flow diagram                                                                                                                                                                           | Figure 1                    |
| Descriptive data         | 14* | (a) Give characteristics of study participants (eg demographic, clinical, social) and information on exposures and potential confounders                                                                     | 11<br>24 (Table 1)          |
|                          |     | (b) Indicate number of participants with missing data for each variable of interest                                                                                                                          | 24 (Table 1)                |
|                          |     | (c) <i>Cohort study</i> —Summarise follow-up time (eg, average and total amount)                                                                                                                             | NA                          |
| Outcome data             | 15* | <i>Cohort study</i> —Report numbers of outcome events or summary measures over time                                                                                                                          | 11-12                       |
|                          |     | <i>Case-control study</i> —Report numbers in each exposure category, or summary measures of exposure                                                                                                         |                             |
|                          |     | <i>Cross-sectional study</i> —Report numbers of outcome events or summary measures                                                                                                                           |                             |
| Main results             | 16  | (a) Give unadjusted estimates and, if applicable, confounder-adjusted estimates and their precision (eg, 95% confidence interval). Make clear which confounders were adjusted for and why they were included | 11-12<br>26 (Table 2 and 3) |
|                          |     | (b) Report category boundaries when continuous variables were categorized                                                                                                                                    |                             |
|                          |     | (c) If relevant, consider translating estimates of relative risk into absolute risk for a meaningful time period                                                                                             |                             |
| Other analyses           | 17  | Report other analyses done—eg analyses of subgroups and interactions, and sensitivity analyses                                                                                                               | 27 (Table 4)                |
| <b>Discussion</b>        |     |                                                                                                                                                                                                              |                             |
| Key results              | 18  | Summarise key results with reference to study objectives                                                                                                                                                     | 13                          |
| Limitations              | 19  | Discuss limitations of the study, taking into account sources of potential bias or imprecision. Discuss both direction and magnitude of any potential bias                                                   | 16                          |
| Interpretation           | 20  | Give a cautious overall interpretation of results considering objectives, limitations, multiplicity of analyses, results from similar studies, and other relevant evidence                                   | 13-16                       |
| Generalisability         | 21  | Discuss the generalisability (external validity) of the study results                                                                                                                                        | 13-16                       |
| <b>Other information</b> |     |                                                                                                                                                                                                              |                             |
| Funding                  | 22  | Give the source of funding and the role of the funders for the present study and, if applicable, for the original study on which the present article is based                                                | 18                          |

\*Give information separately for cases and controls in case-control studies and, if applicable, for exposed and unexposed groups in cohort and cross-sectional studies.

1  
2  
3  
4 **Note:** An Explanation and Elaboration article discusses each checklist item and gives methodological background and published examples of transparent reporting. The STROBE  
5 checklist is best used in conjunction with this article (freely available on the Web sites of PLoS Medicine at <http://www.plosmedicine.org/>, Annals of Internal Medicine at  
6 <http://www.annals.org/>, and Epidemiology at <http://www.epidem.com/>). Information on the STROBE Initiative is available at [www.strobe-statement.org](http://www.strobe-statement.org).  
7  
8  
9  
10  
11  
12  
13  
14  
15  
16  
17  
18  
19  
20  
21  
22  
23  
24  
25  
26  
27  
28  
29  
30  
31  
32  
33  
34  
35  
36  
37  
38  
39  
40  
41  
42  
43  
44  
45  
46  
47  
48  
49

For peer review only

## STUDY PROTOCOL

## Open Access

# The effectiveness of substitution of hospital ward care from medical doctors to physician assistants: a study protocol

Marijke JC Timmermans<sup>1,2\*</sup>, Anneke JAH van Vught<sup>2</sup>, Michel Wensing<sup>1</sup> and Miranda GH Laurant<sup>1,3</sup>

## Abstract

**Background:** Because of an expected shrinking supply of medical doctors for hospitalist posts, an increased emphasis on efficiency and continuity of care, and the standardization of many medical procedures, the role of hospitalist is increasingly allocated to physician assistants (PAs). PAs are nonphysician clinicians with medical tasks. This study aims to evaluate the effects of substitution of hospital ward care to PAs.

**Methods/Design:** In a multicenter matched controlled study, the traditional model in which the role of hospitalist is taken solely by medical doctors (MD model) is compared with a mixed model in which a PA functions as a hospitalist, contingent with MDs (PA/MD model). Twenty intervention and twenty control wards are included across The Netherlands, from a range of medical specialisms. Primary outcome measure is patients' length of hospital stay. Secondary outcomes include indicators for quality of hospital ward care, patients experiences with medical ward care, patients health-related quality of life, and healthcare providers' experiences. An economic evaluation is conducted to assess the cost implications and potential efficiency of the PA/MD model. For most measures, data is collected from medical records or questionnaires in samples of 115 patients per hospital ward. Semi-structured interviews with healthcare professionals are conducted to identify determinants of efficiency, quality and continuity of care and barriers and facilitators for the implementation of PAs in the role of hospitalist.

**Discussion:** Findings from this study will help to further define the role of nonphysician clinicians and provides possible key components for the implementation of PAs in hospital ward care. Like in many studies of organizational change, random allocation to study arms is not feasible, which implies an increased risk for confounding. A major challenge is to deal with the heterogeneity of patients and hospital departments.

**Trial registration:** ClinicalTrials.gov ID NCT01835444

**Keywords:** Substitution, Task reallocation, Hospitalist, Physician assistant, Costs, Quality

## Introduction

### Background

Healthcare systems across the world face a number of challenges, such as a rising demand for healthcare services, a growing number of chronic ill patients and rising patient expectations. Concurrently, the supply of medical doctors (MDs) is constrained in most countries, leading to workforce shortages [1]. Nonphysician clinicians have

been introduced into the medical domain in order to take over tasks from MDs [2]. An example of a nonphysician clinician is the Physician assistant (PA), a health care professional licensed to practice medicine in defined domains, in collaboration with MDs but with a substantial degree of professional autonomy [3]. PAs obtain medical history, perform physical examinations, request and interpret additional testing, render medical diagnoses and treatment procedures, and prescribe medication. They also perform specific medical procedures, such as endoscopies, catheterizations, elective cardioversion and minor surgeries [3,4]. In addition, PAs contribute to the quality of care by

\* Correspondence: [Marijke.Timmermans@radboudumc.nl](mailto:Marijke.Timmermans@radboudumc.nl)

<sup>1</sup>Scientific Institute for Quality of Healthcare, Radboud University Medical Center, Nijmegen, The Netherlands

<sup>2</sup>Master Physician Assistant, HAN University of Applied Sciences, Nijmegen, The Netherlands

Full list of author information is available at the end of the article

1  
2  
3  
4  
5 developing protocols, initiate or participate in quality projects and education programs [5].

6  
7 The PA was first introduced in the sixties in the United States and then rapidly spread across the country [4]. In the Netherlands, the first PAs were introduced in 2001 [6,7]. Currently approximately 630 graduated PAs are employed in the Dutch healthcare system, on a total of about 65 000 registered physicians [8]. In the next few years, about 120 PAs will yearly complete their Master program. Contrary to the USA, where the majority of PAs work in primary care settings, most Dutch PAs (about 75%) work in the hospital settings [9]. The majority works at general surgery, surgical subspecialties, cardiology, anesthesiology or internal medicine [10]. The main features of Dutch PAs are [7,10]:

- PAs follow a 30 month training program at a Master's degree level.
- The Dutch PA programs incorporate a dual work-education model, which means that students are employed within a particular medical specialty while enrolled in the master's PA program. The students undertake didactic and clinical education within this medical specialty from the beginning till the end of the curriculum.
- PA students are professionals with a health care-related bachelor's degree and at least 2 years of clinical work experience in the health care domain.
- PAs conduct low to moderately complex medical tasks within a certain specialty, both in primary and secondary care. Most PAs practice in the hospital setting.
- Since January 2013, PAs are authorized to indicate and perform predefined medical procedures and subscribe medication without supervision. The scope of practice will be re-evaluated in 2017.
- Physician Assistant is a protected title by law. The legislation is written in the Individual Health Care Professions Act (Wet BIG), article 36a.

20  
21  
22  
23  
24  
25  
26  
27  
28  
29  
30  
31  
32  
33  
34  
35  
36  
37  
38  
39  
40  
41  
42  
43  
44  
45  
46 Since the first introduction of the PA, several studies have examined their performance. This body of evidence suggests that PAs can provide high-quality care in a large range of medical disciplines [11-14]. The studies indicate that they provide care that is comparable to that of MDs, with high levels of patient satisfaction [15-18]. Although there is international evidence for both efficacy and effectiveness supporting the reallocation of care from MDs to PAs, current research does not cover all settings and professions [2,13]. Many studies concern primary and critical care settings, while studies assessing the effects of substitution of non-acute inpatient medical care are limited. Some studies show methodological limitations like single centered, non-randomized, a relatively

small sample size or no control condition. Besides, concerns have been expressed regarding potential adverse effects of involving PAs, such as negative impacts on patient safety and continuity of healthcare delivery.

In this study we focus on patients admitted to a hospital, who are taken care by a hospitalist. Hospitalists are responsible for the coordination of the daily medical care of hospitalized patients [19]. This role has traditionally been fulfilled by medical residents (MRs) and occasionally by medical specialists. In recent years, the role of hospitalist has been increasingly reallocated to PAs [3,11], facilitated by technological innovations and the standardization of many medical procedures by clinical protocols [20,21]. In 2013, approximately 200 graduated PAs were employed as hospitalist in the Netherlands. When PAs are employed as hospitalists, the applied model to cover 24/7 ward care is often a mixed model that contains both PAs and MDs as hospitalist, comprising a patient medical care team. The tasks of PAs in such a team are comparable to those of the MDs. The PAs, however, tend to work during daytime on weekdays, while MDs often work during evenings, nights and weekends. It is anticipated that within the next decades PAs will be increasingly employed in the management of hospitalized patients for a range of different specialism. However, empirical evidence about the consequences of reallocating medical ward care from MDs to PAs for the quality and safety of care is currently limited.

### Study aim

The primary aim of this study is to determine the effectiveness of hospital ward care by MDs compared to a patient medical care team consisting of both PAs and MDs. It is hypothesized that due to reallocation of care to a fixed number of PAs per hospital ward, inpatient care becomes more standardized and continued resulting in improved care, which will be reflected by shorter hospital stay. To measure effectiveness we therefore choose length of hospital stay (LoHS) as primary outcome measure. Besides the effectiveness, also the effects on quality and continuity of care and patient and care provider experiences are investigated.

### Methods/Design

#### Study design and population

A multicenter non-randomized matched-controlled study is performed in The Netherlands, comparing wards utilizing a mixed 'PA/MD model' (intervention group) with wards utilizing a solely 'MD model' (control group, usual care). Control wards are matched with the intervention wards on the basis of medical specialism and hospital type (i.e. academic versus non-academic). Data collection runs parallel for each pair of matched intervention and control ward, with a maximum deviation of two weeks.

### Study setting

Hospital wards are being assigned to the intervention group if the PA has completed an accredited master's PA degree and covers at least 51% of the available ward care hours per week during dayshifts (8 h-18 h) on weekdays. Wards are assigned to the control group if solely MDs fulfill the hospitalist position. Exclusion criteria at ward level are: 1) Nurse practitioners (including in training) in the role of hospitalist; 2) Only non-graduated PAs in the role of hospitalist; 3) Psychiatric and pediatric wards and intensive care units. In order to enhance the generalizability of findings we include a heterogeneous sample of hospitals across the country and a mix of medical specialism.

### Study population

The focus of this study is on the patients admitted to the included hospital wards. Exclusion criteria at patient level are: 1) Patients younger than 18 years; 2) Terminally ill patients; 3) Patients in daycare. Daycare is defined as hospital admissions which are intended to last 24 hours or less. For patients who are not able to fill in questionnaires (e.g. patients with cognitive impairment), family relatives are asked to fill in the questionnaires. Besides the patients, also the PAs, MDs, and a sample of ten nurses who are employed at the included ward are involved as study objects. The sample of nurses is established by selecting the first ten nurses who are scheduled for a dayshift during the third week from data collection.

### Primary outcome

LoHS is the primary outcome measure. Reducing LoHS is important for payers of healthcare and for many patients. LoHS is defined as the time period in days between date of discharge and date of admission. To control for discharge delay for nonmedical reasons, i.e. delay attributable to waiting times for a place in a nursing home or a rehabilitation clinic, or help in the patient's own home, we also register the date of completion of medical treatment in the hospital.

### Secondary outcomes

#### Quality of hospital ward care

To assess the quality of ward care, a set of eleven global clinical and process indicators has been selected from the literature and suggestions by a physician panel. The clinical indicators were derived from a national set of indicators for quality of hospital care from the Dutch Health Care Inspectorate (IGZ) [22]. All indicators cover a period of maximum one month after discharge. The selected indicators are:

Clinical indicators:

- Inhospital mortality
- Unplanned transfer to intensive care unit
- Cardiopulmonary resuscitation

- Pressure sore developed during admission
- Fever: number of days body temperature  $\geq 38$
- Pain score: number of days Numeric Rating Score  $\geq 7$
- Hospital infections: infusion-, urinary track-, airway-, and postoperative wound infections
- Presentation at department of emergency, within one month after discharge
- Non-elective readmission within one month after discharge

Process indicators:

- Days between discharge and letter of discharge
- Introduction hospitalist to the patient less than 24 hours after hospital admission

Data about unplanned readmission and presentation at emergency department after discharge are collected using self-administered patient questionnaires, which are sent at one month after discharge date. Information about the other indicators will be retrospectively derived from patient medical records.

#### Patients health-related quality of life

Generic health-related quality of life is measured with the Euroqol-5D (EQ-5D), which is a widely used validated questionnaire containing five domains: mobility, self-care, usual activities, pain, and anxiety/depression [23]. Each domain has three possible levels indicating; no problems, moderate problems or severe problems. Besides, respondents are asked to value their overall health status on a visual analog scale, ranging from 0 (defined as the worst imaginable health state) to 100 (defined as the best imaginable health state). The EQ-5D is assessed by patient questionnaires at three time points: at admission, discharge and one month after discharge.

#### Patient experiences with medical ward care

Patient experiences with medical ward care are assessed by a self-administered questionnaire at discharge. This questionnaire focuses on satisfaction with communication, experienced continuity of care and cooperation, and the patients view on the medical competencies of the hospitalist. Patient perceptions on communication skills of the hospitalist are measured with the Communication Assessment Tool (CAT), which consists of 15 questions and can be rated on a 5 point Likert scale, ranging from 'poor' to excellent'. Although not validated in the Netherlands, the CAT has already proven to be a reliable and valid instrument in the hospital setting in the US [24]. Three subscales from the 'Chronically Ill Patients Evaluate general Practice' (CEP) questionnaire were added to measure the items satisfaction with continuity of care, cooperation of ward care providers, and medical competencies of the

hospitalist [25]. Each item will be rated on a six point Likert scale, ranging from 'poor' to 'excellent'. As this questionnaire has only been validated for primary care, psychometric properties will be examined in this study. To ensure that patients know who their hospitalist is, we include photos from the hospitalist(s) in the questionnaire. To assess whether patients understood the questions asked in the self-administered questionnaires, we pre-tested the questionnaire in a sample of ten patients admitted to two hospital wards in different hospitals.

### **Health professionals' work experiences and job characteristics**

An online questionnaire is compiled to measure job satisfaction, distress outcomes and other job characteristics of the care providers working at the included hospital wards; i.e. all MDs and PAs who fulfill the role of hospitalist, and a random sample of ten nurses in each of the participating wards.

*Job satisfaction* is assessed with the McCranie Job Satisfaction Scale, which consists of 13 questions which can be rated on a 6-point Likert scale, ranging from very dissatisfied to very satisfied [26]. The questionnaire addresses satisfaction with the amount of time which is available per patient, satisfaction with the level of work challenge, and satisfaction with the collaboration with nurses, medical specialists and medical residents. Some items were rephrased to make them appropriate for the specific profession of our interest and some questions were added. For all professions we additionally ask about satisfaction with collaboration with PAs. Besides, in the questionnaire for medical specialists a question about satisfaction with time spend on supervision was added, and in the questionnaire for hospitalists we additionally ask for satisfaction with the received supervision. Finally, respondents are asked to value their overall job satisfaction on a visual analog scale, ranging from 1 (extremely unsatisfied) to 10 (extremely satisfied).

*Job stress* is assessed by the 12-item General Health Questionnaire (GHQ-12). The GHQ-12 is a unidimensional, validated scale which comprises questions regarding anxiety, depression, social dysfunction, and loss of confidence. Statements are rated on a 4-point rating scale (symptom present: "not at all" = 0, "same as usual" = 0, "more than usual" = 1, and "much more than usual" = 1) GHQ-12 scores range from 0 to 12 with a higher score indicative of poorer psychological well-being [27].

*Workload* of hospitalists is measured in terms of number of patients seen per day and weekly overtime hours. We ask hospitalists (both PAs and medical residents) and medical specialists for the number of hours per week spend on both direct and indirect patient contacts at the hospital ward, and the number of hours per month spend on non-patient related tasks like participating in quality

and patient safety projects and performing scientific research. In the questionnaire for hospitalists we additionally ask for the number of hours spend on patient related non-hospitalist tasks like performing medical procedures or supporting outpatient care. Besides, we ask the hospitalists how much supervision time they obtain, and the medical specialists how many time they spend on supervision.

### **Continuity of care**

Effects of substitution of hospital ward care on patient experienced continuity of care are measured by a set of questions in the patient questionnaire at discharge, as described in the section 'patients experiences with medical ward care'. Additionally, continuity of care is established by evaluating work schedules. All hospitalists are asked to fill in their real work schedule during fixed weeks: week 3, 7, 11 and 15 after the start of the inclusion of patients. Continuity of care will be assessed by counting the number of rotations in the hospitalist position during these fixed four weeks. Data collection runs parallel for each pair of matched intervention and control ward.

### **Qualitative research**

Semi-structured interviews are conducted to identify determinants which contribute to the safety, clinical effectiveness and cost-effectiveness of hospital ward care by PAs. Also barriers and facilitators for the implementation of PAs in the role of hospitalist are explored. The interviews are held with a sample of PAs, (specialized) MDs, heads of the departments and nurses. Sampling is done purposively. A variety of care providers are include, covering different medical specialties and medical ward care models. Interviews will be taken until data saturation is achieved on the basis of interim-analyses after each set of five to eight interviews, with a minimum of twenty interviews. A topic list, which will be refined iteratively during the process of data collection and analysis, is used to frame the interview. The TICD framework of Flottorp et al is used to standardize the reporting of barriers and facilitators [28]. Barriers are analyzed in the context of the innovation itself, the individual professional and the patient, and the social context, the organizational context and the economic and political context.

### **Economic evaluation**

To assess the cost implications and efficiency of substitution of hospital ward care from MDs to teams with PAs, an economic evaluation is conducted alongside the outcomes evaluation. This economic evaluation is based on the general principles of a cost-effectiveness analysis, except that the time horizon per included patient is limited to one month after discharge. If equivalence of

effects is established the economic decision rule alters in 'cost minimization'. The primary cost outcome for the economic evaluation is costs associated with the principal admission (LoHS, resource use, consultation of health care suppliers, salaries, productivity loss) and costs that occurred after discharge that is potentially related to hospital ward care (unplanned readmission, presentation at emergency departments, visits of general practitioner, required home care, productivity loss) in a period from admission until one month after discharge (Table 1). The primary effect outcome in the economic evaluation is EQ-5D based QALYs. We will also analyze costs in relation to

LoHS, the primary outcome in the outcomes evaluations. Besides these costs and effects, information about patient characteristics such as gender, age, primary diagnoses and co-morbidities are collected in order to account for patient case-mix as far as possible. All patient-related volumes are collected in detail at an individual patient level, primarily from medical patient records and patient and care provider questionnaires. Costs will be calculated by multiplying the volumes of healthcare use with corresponding unit prices, derived from the Dutch Manual for Costing Research [29], which also include organizational overhead costs. All figures will be related to the price level of the same year.

**Table 1 Volumes included in the economic evaluation**

| Volume                                                            | Unit                                            |
|-------------------------------------------------------------------|-------------------------------------------------|
| <b>During hospital stay at the included ward*</b>                 |                                                 |
| Length of hospital stay                                           | Number of days                                  |
| Non-elective transfer to ICU                                      | Number of days                                  |
| <i>Resource use:</i>                                              |                                                 |
| Surgery                                                           | Type of surgery                                 |
| Medication                                                        | Frequency, dose and type of medicine            |
| Laboratory tests                                                  | Frequency and type of blood test                |
| Radiographic imaging                                              | Frequency and type of radiographic imaging      |
| Scopic tests                                                      | Frequency and type of scopic test               |
| Blood components                                                  | Number of units                                 |
| Consultation with health care suppliers†                          | Number of consultations                         |
| <i>Medical ward staff:</i>                                        |                                                 |
| Hospitalists                                                      | Working hours per week hospitalist              |
| Supervision by medical specialist                                 | Number of hours supervision per week            |
| <b>During the first month after discharge†</b>                    |                                                 |
| Non-elective presentation at emergency department after discharge | Number of presentations at emergency department |
| Non-elective readmission                                          | Number of days                                  |
| Non-elective visit to GP                                          | Number of visits to GP post                     |
|                                                                   | Number of visits by GP at patient's home        |
|                                                                   | Number of visits to GP                          |
|                                                                   | Number of telephone contacts with GP            |
| Required nursing home care                                        | Number of hours per week                        |
| Required domestic home care                                       | Number of hours per week                        |
| Productivity loss                                                 | Hours per week                                  |

*Abbreviations:* ICU Intensive Care Unit, GP General Practitioner.

\*Assessed by extraction of patient medical records.

†Assessed by patient questionnaires one month after discharge.

\*e.g. medical specialist, physiotherapist, dietician, diabetes nurse, occupational therapist, medical social work, psychologist.

### Confounders

Because of the non-randomized character of this study and the heterogeneity of patients and hospital wards, there is a risk of confounding. We will correct for a number of predefined confounders in the statistical analyses. The covariables related to *patients* are: gender, age, education, ethnicity, marital status, smoking status, body mass index, primary diagnosis, co morbidities, number of prior hospitalizations, type of admission (elective or emergent), discharge destination and the health-related quality of life at admission. *Healthcare provider factors* are gender, age, highest education, profession, years since graduation, years on the job, extent of employment, regularity of work schedules and workload. *Hospital ward characteristics* are medical specialism, hospital type, teaching status, number of admissions, bed occupancy, and number of MDs, PAs and nurses are assessed. Covariables are extracted from patient medical records and patient and care provider questionnaires.

### Sample size calculation

To detect a relative difference in LoHS of 20% between the mixed 'PA/MD model' and solely 'MD model', assuming an average LoHS of 7 days [30], alpha 5%, power 80% and an ICC of 0.06 for patients in same ward, 40 wards including 100 patients each are required. Taking into account an expected drop-out rate of 10% at the level of wards, and a 10% drop out rate of patients (withdrawal of informed consent), 44 wards (22 in each arm) with each 115 patients are included. The number of in depth interviews depends on the moment data saturation is attained.

### Data analyses

To compare hospital wards utilizing a mixed 'PA/MD model' with wards utilizing a solely 'MD model', we use logistic regression analyses for dichotomous outcomes and linear regression analysis for continuous outcomes, both with random coefficients to account for statistical clustering of data in hospital wards. The analysis is on



an intention to treat basis and matching will be taken into account. Missing values are substituted by multiple imputation techniques. Multivariable models are constructed to correct for potential confounders. Covariables are included in the final model only if they modify the regression coefficient of ward care model (i.e. the central determinant) by more than 10% (regardless of statistical significance of effects). Explorative subgroup analyses per medical specialism will be conducted for each set of at least six wards with similar specialism are included. All estimates are calculated with 95% confidence intervals.

### Economic analyses

Discounting of costs and effects is applied as recommended for health economic evaluations in The Netherlands [29]. A comparison is made between the intervention and control group on incremental costs and incremental effects. The incremental cost-effectiveness ratio (ICER) will be calculated as follows:  $ICER = (\Delta \text{ costs} / \Delta \text{ effects})$  where  $\Delta$  costs represents the difference in annual mean costs between intervention and control group, and  $\Delta$  effects represents the difference in QALYs between the two groups.

The uncertainty associated with estimates is explored with a bootstrap resampling procedure to produce cost-effectiveness planes as well as targeted one-way sensitivity analyses of potential drivers of key cost (such as type of ward). The bootstrapped ICERs will be presented in a cost-effective acceptability curve displaying the probability that the intervention is cost-effective for a wide range of willingness-to-pay thresholds. P-value is set at 0.05 to indicate statistical significance. To test for several assumptions (i.e. cost-prices and salary), one-way sensitivity analyses will be conducted on the range of extremes.

### Qualitative data analyses

The semi-structured interviews are audio-taped and transcribed verbatim with participants consent. A deductive process of thematic analysis is used to classify responses within themes. The theoretical domains previously described are used as the coding framework. Analyses are conducted in Atlas.ti software. Two researchers will code and analyze the transcript independently to reduce subjectivity. Consensus is reached by discussion. Member checking confirm the credibility of the data: each participant will be given a full transcript of the interview with a summary of themes to determine whether the themes were appropriately identified and matched their responses.

### Ethical considerations

The research ethics committee of the Radboud university medical center has declared that this study doesn't fall within the remit of the Medical Research Involving

Human Subjects Act (WMO) (registration number 2012/306). This means that this research can be carried out without an approval by an accredited research ethics committee. All data will be handled strictly confidential. Written informed consent is obtained from all patients.

### Discussion

To our knowledge, this is the first multicenter study which investigates the efficacy and effectiveness of reallocation of hospital ward care from MDs to PAs. Most international studies on reallocation of care to PAs are restricted to primary or critical care, limited to one outcome measure, or are of insufficient methodological quality [2].

The major strengths of this study are the multicenter design and the broad view; we perform measurements both at patient, care provider and hospital ward level. A wide variation of instruments and methods is used to obtain data; we use both quantitative measurements (medical patient records, patient and care provider questionnaires, work schedules) and qualitative measurements (semi-structured interviews). As a consequence, we provide not only useful information about the objective effects of reallocation of hospital ward care on a range of outcomes, but we are also able to determine barriers and facilitators for the implementation.

One of the limitations is the non-randomized design of this study. In the Netherlands, PAs followed a so-called 'dual program,' which means that students are employed within a particular medical specialty while enrolled in the master's PA program (Table 1). After graduation, PAs are intended to be employed at the same department. The suggestion of randomly relocating the graduated PA to other hospital wards would lead to resistance among the medical specialists who put considerable effort and time to training and supervision.

The non-randomized character of this study implies an increased risk for confounding, which we will take into account in the multivariable analyses. Another challenge is to deal with the heterogeneity of patients across hospital wards. Each hospital differs slightly in determinants like the organization of ward care (care by medical resident or specialist, arrangement of supervision), policies about quality of care, patient case-mix and medical subspecialties, which might reduce explained variation and subsequently reduce the power of this study. When appropriate, we will conduct explorative secondary quantitative and qualitative analyses to explain heterogeneity.

This multicenter study adds to the current body of knowledge by creating more knowledge of the effects of task reallocation in hospitals on the efficiency, quality and continuity of care. Findings from this study will help to further define the role of nonphysician clinicians and provides possible key components for the implementation of PAs in hospital ward care.

### Competing interests

MW and MGH Laurant have no conflicts of interest. Both MJC Timmermans and JAH van Vught work as a teacher at one of the PA Master programs.

### Authors' contributions

ML and MT are responsible for the design of the study with comments of AvV and MW. MT wrote first draft of the manuscript and all other authors revised this critically. MT is responsible for the data collection and data management with direct supervision and feedback from ML. All authors read and approved the final manuscript.

### Acknowledgement

We would like to thank all members of the Worthy Assistants advisory group, i.e. E. Adang, G. van den Brink, D. Cohen, E. van Leeuwen, C. Postma, W. van Unen, I. van der Velden and T. Wobbles for their contribution to the design of the study and the recruitment of hospital wards.

### Funding

This study is funded by a research grant from The Netherlands Organization for Health Research and Development (ZonMw) (project number 171202006).

### Author details

<sup>1</sup>Scientific Institute for Quality of Healthcare, Radboud University Medical Center, Nijmegen, The Netherlands. <sup>2</sup>Master Physician Assistant, HAN University of Applied Sciences, Nijmegen, The Netherlands. <sup>3</sup>Faculty of health, behavior and society, HAN University of Applied Sciences, Nijmegen, The Netherlands.

Received: 23 July 2013 Accepted: 24 January 2014

Published: 28 January 2014

### References

- Salsberg E, Grover A: **Physician workforce shortages: implications and issues for academic health centers and policymakers.** *Acad Med* 2006, **81**(9):782–787.
- Laurant M, *et al*: **The impact of nonphysician clinicians: do they improve the quality and cost-effectiveness of health care services?** *Med Care Res Rev* 2009, **66**(6 Suppl):36S–89S.
- Mittman DE, Cawley JF, Fenn WH: **Physician assistants in the United States.** *BMJ* 2002, **325**(7362):485–487.
- Merkle F, *et al*: **The physician assistant: shifting the paradigm of European medical practice?** *HSR Proc Intensive Care Cardiovasc Anesth* 2011, **3**(4):255–262.
- Legler CF, Cawley JF, Fenn WH: **Physician assistants: education, practice and global interest.** *Med teach* 2007, **29**(1):e22–e25.
- Hooker RS, Kuilman L: **Physician assistant education: five countries.** *J Physician Assist Educ* 2011, **22**(1):53–58.
- Spengelink-Schut G, Ten Cate OTJ, Kort HSM: **Training the physician assistant in the Netherlands.** *J Physician Assist Educ* 2008, **19**(4):46–53.
- Ministry of Health, Welfare and Sport: *The National Institute of Public Health and the Environment. Number of physicians and nurses*; 2013. <http://www.gezondheidszorgbalans.nl> (date 16 July 2013).
- Velde FVD, Windt WVD: *Alumni van de masteropleiding Physician Assistant*. Utrecht: Kiwa Prismant; 2013.
- Dutch Association of Physician Assistants*; 2013. <http://www.napa.nl> (date 29 May 2013).
- Ford WT, Britting LL: **Nonphysician providers in the hospitalist model: a prescription for change and a warning about unintended side effects.** *J Hosp Med* 2010, **5**(2):99–102.
- Kleinpell RM, Ely EW, Grabenkort R: **Nurse practitioners and physician assistants in the intensive care unit: an evidence-based review.** *Crit Care Med* 2008, **36**(10):2888–2897.
- Parekh VI, Roy CL: **Nonphysician providers in hospital medicine: not so fast.** *J Hosp Med* 2010, **5**(2):103–106.
- Stewart A, Catanzaro R: **Can physician assistants be effective in the UK?** *Clin Med* 2005, **5**(4):344–348.

- Counselman FL, Graffeo CA, Hill JT: **Patient satisfaction with physician assistants (PAs) in an ED fast track.** *Am J Emerg Med* 2000, **18**(6):661–665.
- Grzybicki DM, *et al*: **The economic benefit for family/general medicine practices employing physician assistants.** *Am J Manag Care* 2002, **8**(7):613–620.
- Hooker RS: **A cost analysis of physician assistants in primary care.** *JAAPA* 2002, **15**(11):39–42–45, 48 *passim*.
- Miller W, *et al*: **Use of physician assistants as surgery/trauma house staff at an American College of Surgeons-verified Level II trauma center.** *J Trauma* 1998, **44**(2):372–376.
- Wachter RM, Goldman L: **The emerging role of "hospitalists" in the American health care system.** *N Engl J Med* 1996, **335**(7):514–517.
- Rol MVD, Schmit Jongbloed LJ: *Zorgredistributie Sturen op kwaliteit en doelmatigheid in de zorg*. Leiden: LSJ Medisch projectbureau; 2010.
- Meijerink MH: *Bekwaam is bevoegd*. Den Haag: Raad voor de Volksgezondheid en Zorg; 2011.
- Gezondheidszorg IVD: *Basisset kwaliteitsindicatoren ziekenhuizen 2013, W.e.S.* Utrecht: Ministerie van Volksgezondheid; 2012.
- The EuroQol Group: **EuroQol—a new facility for the measurement of health-related quality of life.** *Health Policy* 1990, **16**(3):199–208.
- Makoul G, Krupat E, Chang CH: **Measuring patient views of physician communication skills: development and testing of the communication assessment tool.** *Patient Educ Couns* 2007, **67**(3):333–342.
- Wensing M, *et al*: **Quality assessment by using patients' evaluations of care.** *European Journal of General Practice* 1998, **4**:150–153.
- McCranie EW, Hornsby JL, Calvert JC: **Practice and career satisfaction among residency trained family physicians: a national survey.** *J Fam Pract* 1982, **14**(6):1107–1114.
- Goldberg DP, Hillier VF: **A scaled version of the general health questionnaire.** *Psychol Med* 1979, **9**:139–145.
- Flottorp SA, *et al*: **A checklist for identifying determinants of practice: a systematic review and synthesis of frameworks and taxonomies of factors that prevent or enable improvements in healthcare professional practice.** *Implement Sci* 2013, **23**(8):35.
- Oostenbrink JB, Koopmanschap MA, Rutten FF: *Handbook for cost studies, methods and guidelines for economic evaluation in health care*. Hague: Health care Insurance Council; 2004.
- Borghans I, *et al*: **Benchmarking and reducing length of stay in Dutch hospitals.** *BMC Health Serv Res* 2008, **8**:220.

doi:10.1186/1472-6963-14-43

**Cite this article as:** Timmermans *et al.*: The effectiveness of substitution of hospital ward care from medical doctors to physician assistants: a study protocol. *BMC Health Services Research* 2014 **14**:43.

**Submit your next manuscript to BioMed Central and take full advantage of:**

- Convenient online submission
- Thorough peer review
- No space constraints or color figure charges
- Immediate publication on acceptance
- Inclusion in PubMed, CAS, Scopus and Google Scholar
- Research which is freely available for redistribution

Submit your manuscript at  
[www.biomedcentral.com/submit](http://www.biomedcentral.com/submit)

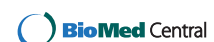

## ERRATUM

## Open Access

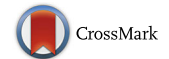

# Erratum to: The effectiveness of substitution of hospital ward care from medical doctors to physician assistants: a study protocol

Marijke J. C. Timmermans<sup>1\*</sup>, Anneke J. A. H. van Vught<sup>2</sup>, Michel Wensing<sup>1</sup> and Miranda G. H. Laurant<sup>1,2</sup>

Unfortunately, the original version of this article [1] contained an error in the text. The correction of this error and also an adjusted sample size calculation is detailed below.

## Corrections

### Year of authorization of PAs

After publication of our study protocol, we noticed an error at the fifth bullet on page 2 [1]. We described that since January 2013 PAs are authorized to indicate and perform predefined medical procedures and subscribe medication without supervision. January 2013 should however be January 2012 [2].

### Adjusted sample size calculation

In the original study protocol we described a sample size calculation in which an average length of hospital stay (LoHS) of 7 days and a standard deviation of 6 days was used. These numbers were based on a study of Borghans et al, in which the LoHS was presented of all patients who were admitted at 69 hospitals in the Netherlands during one year [3]. This concerned all possible medical specialisms. However, we included the following specialisms in our study population: general surgery, pulmonology, gastroenterology, cardiology, orthopedics and otolaryngology (ENT). The medical specialisms with relatively high LoHS (f.e. cardiothoracic surgery, geriatrics, dermatology) and relatively low LoHS (f.e. ophthalmology, plastic surgery, gynecology) were not represented [4]. This composition prompted us to recalculate the required sample size. Instead of a LoHS of 7 days and a SD of 6, a LoHS of 6 days and a SD of 4.8 days was used, which better fitted with our study population. All other parameters remained the same.

Taking into account an expected drop out of maximum 2 matched pairs, 34 wards (17 in each arm) with each 100 patients are required. In case of no drop out, 50 patients per ward are sufficient to detect a significant difference in LoHS, with an expected 20 % reduction in LoHS, alpha 5 %, power 80 % and ICC 0.06.

As a consequence of the matched controlled study design, the SD in our study population might be smaller than the above mentioned SD of 4.8, but we are unable to provide reliable estimates [5].

## Acknowledgement

We would like to thank Dr. S. Teerenstra (Statistician, Radboud university medical center, Department of Health Evidence) for his assistance with the recalculation of the power.

## Author details

<sup>1</sup>Radboud University Medical Center, Radboud Institute for Health Sciences, Scientific Center for Quality of Healthcare (IQ healthcare, Nijmegen, The Netherlands. <sup>2</sup>HAN University of Applied Sciences, Faculty of Health and Social Studies, Nijmegen, The Netherlands.

Received: 10 July 2014 Accepted: 3 March 2016

Published online: 04 April 2016

## References

1. Timmermans MJC, Van Vught AJ, Wensing M, Laurant MGH. The effectiveness of substitution of hospital ward care from medical doctors to physician assistants: a study protocol. *BMC Health Serv Res.* 2014;14:43.
2. Dutch Association of Physician Assistants; 2013. <http://www.napa.nl> (date 29 May 2013)
3. Borghans I, Heijink R, Kool T, Lagoe RJ, Westert G. Benchmarking and reducing length of stay in Dutch hospitals. *BMC Health Serv Res.* 2008;8:220.
4. Bouwman B. *Ligduurmonitor Nederlandse Ziekenhuizen*. Arnhem: Coppia Consultancy; 2010.
5. Stuart EA. Matching methods for causal inference: A review and a look forward. *Stat Sci.* 2010;25(1):1–21.

\* Correspondence: [Marijke.Timmermans@radboudumc.nl](mailto:Marijke.Timmermans@radboudumc.nl)

<sup>1</sup>Radboud University Medical Center, Radboud Institute for Health Sciences, Scientific Center for Quality of Healthcare (IQ healthcare, Nijmegen, The Netherlands

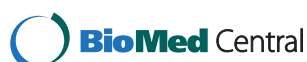

# BMJ Open

## The involvement of physician assistants in inpatient care in hospitals in the Netherlands: a cost-effectiveness analysis

|                                 |                                                                                                                                                                                                                                                                                                                                                                                                                                                                                                                                                                                                       |
|---------------------------------|-------------------------------------------------------------------------------------------------------------------------------------------------------------------------------------------------------------------------------------------------------------------------------------------------------------------------------------------------------------------------------------------------------------------------------------------------------------------------------------------------------------------------------------------------------------------------------------------------------|
| Journal:                        | <i>BMJ Open</i>                                                                                                                                                                                                                                                                                                                                                                                                                                                                                                                                                                                       |
| Manuscript ID                   | bmjopen-2017-016405.R1                                                                                                                                                                                                                                                                                                                                                                                                                                                                                                                                                                                |
| Article Type:                   | Research                                                                                                                                                                                                                                                                                                                                                                                                                                                                                                                                                                                              |
| Date Submitted by the Author:   | 18-Apr-2017                                                                                                                                                                                                                                                                                                                                                                                                                                                                                                                                                                                           |
| Complete List of Authors:       | Timmermans, Marijke; Radboud university medical center, Radboud Institute for Health Sciences, IQ healthcare<br>van den Brink, Geert<br>van Vught, Anneke<br>Adang, Eddy<br>van Berlo, Charles<br>van Boxtel, Kim<br>Braunius, Weibel<br>Janssen, Loes<br>Venema, Alyssa<br>van den Wildenberg, Frits<br>Wensing, Michel; Radboud University Medical Centre, Scientific Institute for Quality of Healthcare<br>Laurant, Miranda; Radboud university medical center, Radboud Institute for Health Sciences, IQ healthcare; HAN University of Applied Sciences, Faculty of health, behavior and society |
| <b>Primary Subject Heading</b>: | Health services research                                                                                                                                                                                                                                                                                                                                                                                                                                                                                                                                                                              |
| Secondary Subject Heading:      | Health policy                                                                                                                                                                                                                                                                                                                                                                                                                                                                                                                                                                                         |
| Keywords:                       | Health & safety < HEALTH SERVICES ADMINISTRATION & MANAGEMENT, Quality in health care < HEALTH SERVICES ADMINISTRATION & MANAGEMENT, Organisation of health services < HEALTH SERVICES ADMINISTRATION & MANAGEMENT                                                                                                                                                                                                                                                                                                                                                                                    |
|                                 |                                                                                                                                                                                                                                                                                                                                                                                                                                                                                                                                                                                                       |

SCHOLARONE™  
Manuscripts

1  
2  
3 **1 The involvement of physician assistants in inpatient care in hospitals in the Netherlands:**  
4  
5 **2 a cost-effectiveness analysis**  
6  
7  
8

9  
10 4 Marijke J.C. Timmermans<sup>1,2</sup>, Geert T. van den Brink<sup>2</sup>, Anneke J.A.H. van Vught<sup>2</sup>, Eddy  
11 5 Adang<sup>3</sup>, Charles L.H. van Berlo<sup>4</sup>, Kim van Boxtel<sup>5</sup>, Weibel W. Braunius<sup>6,7</sup>, Loes Janssen<sup>8</sup>,  
12 6 Alyssa Venema<sup>9</sup>, Frits J. van den Wildenberg<sup>10</sup>, Michel Wensing<sup>1,11</sup>, Miranda G.H. Laurant<sup>1,2</sup>  
13  
14  
15  
16  
17

- 18 **1.** Radboud university medical center, Radboud Institute for Health Sciences, Scientific  
19 Center for Quality of Healthcare (IQ healthcare), Nijmegen, The Netherlands  
20  
21 **2.** HAN University of Applied Sciences, Faculty of Health and Social Studies, Nijmegen,  
22 The Netherlands  
23  
24 **3.** Radboud university medical center, Radboud Institute for Health Sciences, Department of  
25 Health Evidence, Nijmegen, The Netherlands  
26  
27 **4.** VieCuri Medical Center Noord-Limburg, Department of Surgery Venlo, The Netherlands  
28  
29 **5.** Jeroen Bosch Hospital, Department of Gastroenterology, Den Bosch, The Netherlands  
30  
31 **6.** UMC Cancer Center, University Medical Center Utrecht, Department of Head and Neck  
32 Surgical Oncology, Utrecht, The Netherlands  
33  
34 **7.** University Medical Center Utrecht, Department of Otorhinolaryngology, Utrecht, The  
35 Netherlands  
36  
37 **8.** VieCuri Medical Center Noord-Limburg, Department of Orthopaedics, Venlo, The  
38 Netherlands  
39  
40 **9.** Elisabeth-Tweesteden Hospital, Department of Surgery, Tilburg, The Netherlands  
41  
42 **10.** Canisius Wilhelmina Hospital, Department of Surgery, Nijmegen, the Netherlands.  
43  
44 **11.** Heidelberg University Hospital, Department of General Practice and Health Services  
45 Research, Heidelberg, Germany.  
46  
47  
48  
49  
50  
51  
52  
53  
54  
55  
56  
57  
58  
59  
60

1  
2  
3 26

4  
5 27 **Address for correspondence:**

6  
7 28 Marijke J.C. Timmermans, MSc

8  
9 29 Radboud university medical center

10  
11 30 Radboud Institute for Health Sciences,

12  
13 31 114 IQ healthcare

14  
15 32 P.O. Box 9101

16  
17 33 6500 HB Nijmegen, The Netherlands

18  
19 34 Tel: 0031 24 3615305

20  
21 35 Fax: not applicable

22  
23 36 Marijke.Timmermans@radboudumc.nl

24  
25 37

26  
27 38 **Running title:** Physician assistants in inpatient care

28  
29 39 **Word count:** 3644

30  
31 40 **Number of tables:** 4

32  
33 41 **Number of figures:** 1

34  
35  
36  
37  
38  
39  
40  
41  
42  
43  
44  
45  
46  
47  
48  
49  
50  
51  
52  
53  
54  
55  
56  
57  
58  
59  
60

1  
2  
3 42 **ABSTRACT**

4  
5 43 **Objective.** To investigate the cost-effectiveness of substitution of inpatient care from medical  
6  
7 44 doctors (MDs) to physician assistants (PAs).

8  
9 45 **Design.** Cost-effectiveness analysis embedded within a multicenter matched-controlled study.  
10  
11 46 The traditional model in which only MDs are employed for inpatient care (MD model) was  
12  
13 47 compared with a mixed model in which besides MDs also PAs are employed (PA/MD  
14  
15 48 model).

16  
17  
18 49 **Setting:** 34 hospital wards across the Netherlands

19  
20  
21 50 **Participants.** 2292 patients were followed from admission till one month after discharge.  
22  
23 51 Patients receiving daycare, terminally ill patients and children were excluded.

24  
25 52 **Primary and secondary outcome measures.** All direct healthcare costs from day of  
26  
27 53 admission until one month after discharge. Health outcome concerned quality-adjusted life  
28  
29 54 years (QALYs), which was measured with the EuroQoL-5D questionnaire.

30  
31 55 **Results.** We found no significant difference for QALY gain (+0.02, 95% CI -0.01-0.05) when  
32  
33 56 comparing the PA/MD model with the MD model. Total costs per patient did not significantly  
34  
35 57 differ between the groups (+ € 568, 95% CI €-254-€1391, p=0.175). Regarding the costs per  
36  
37 58 item, a difference of €309 per patient (95% CI €29-€588, p=0.030) was found in favor of the  
38  
39 59 MD model regarding length of stay. Personnel costs per patient for the provider who is  
40  
41 60 primarily responsible for medical care at the ward, was lower on the wards in the PA/MD  
42  
43 61 model (€-11, 95% CI €-16- €-6, p<0.01).

44  
45  
46  
47 62 **Conclusions.** This study suggests that the cost-effectiveness on wards managed by PAs, in  
48  
49 63 collaboration with MDs, is similar to the care on wards with traditional house staffing. The  
50  
51 64 involvement of PAs may reduce personnel costs, but not overall healthcare costs.

52  
53  
54 65

55  
56 66 **Trial registration:** ClinicalTrials.gov Identifier: [NCT01835444](https://clinicaltrials.gov/ct2/show/study/NCT01835444), April 2013

1  
2  
3 67

4  
5 68 **Key words:** Professional role revision, substitution, physician assistant, hospital care,  
6  
7 69 resource use, costs  
8

9  
10 70

11 71 **Strengths and limitations of this study**

12  
13  
14 72 • This study increases the understanding of the implications of reallocating inpatient  
15  
16 73 care from MDs to PAs on total healthcare costs, as well as on resources uses.  
17

18  
19 74

20  
21 75 • This study captured a large number of patients from 34 hospital wards, which cover  
22  
23 76 both teaching and non-teaching hospitals and six different medical disciplines.  
24

25  
26 77

27  
28 78 • The non-randomized character of this study implies an increased risk for confounding,  
29  
30 79 which we accounted for in the multivariable analyses and subgroup analyses.  
31

32  
33 80

34 81 • Although we performed subgroup analyses, we cannot exclude that local differences  
35  
36 82 like policies about quality of care and patient case-mix influence the results.  
37

38  
39  
40  
41  
42  
43  
44  
45  
46  
47  
48  
49  
50  
51  
52  
53  
54  
55  
56  
57  
58  
59  
60



## 83 BACKGROUND

84 Because of an increased appreciation of continuity of care, pressure to deliver healthcare  
85 efficiently, and local shortages of medical doctors (MDs), medical care for admitted patients  
86 is increasingly reallocated to physician assistants (PAs).<sup>1-3</sup> A PA is a health professional  
87 licensed to practice medicine in defined domains, with variable degrees of professional  
88 autonomy.<sup>4</sup> PAs who provide medical care for admitted patients usually work in a team  
89 comprising both PAs and MDs (i.e. residents, medical specialists or hospitalists).

90  
91 Literature suggests that PAs add to the quality of care by increasing continuity for both  
92 patients and hospital staff.<sup>2</sup> The turnover of house staff is traditionally high due to use of  
93 recent medical graduates who are planning to do fellowships and the mandatory rotational  
94 cycles.<sup>5</sup> PAs generally do not rotate and constitute a factor of stability in the continually  
95 changing medical workforce. Previous studies show that quality of care for admitted patients  
96 delivered by a PA-based team is comparable to that of a resident-based team, and that patient  
97 evaluations are at least as good.<sup>6-10</sup> Our own study showed similar quality and safety of care,  
98 but better patients experiences on wards with a PA-based team.<sup>11</sup> Estimates of PA  
99 employment on costs vary across the conducted studies.<sup>9,10</sup> These studies concerned one  
100 clinical discipline within one hospital, which reduces the generalizability of findings. Besides,  
101 all studies were conducted in the United States, where most hospitals involving PAs concern  
102 only acute care. In the Netherlands, most hospitals include both acute and chronic care under  
103 one roof. Given the outcomes of these studies and their limitations, we conducted a  
104 multicenter study that included PAs providing care to hospitalized patients including a range  
105 of clinical disciplines. This paper reports on the cost-effectiveness of substitution of inpatient  
106 care from MDs to PAs. Costs concerned all direct healthcare costs from day of admission  
107 until one month after discharge. Health outcome concerned quality-adjusted life years

1  
2  
3 108 (QALYs), which is a composite measure of effectiveness consisting of quality of life and life  
4  
5 109 years gained.  
6

7 110

## 111 **METHODS**

### 112 **Study design**

113 This economic evaluation was performed alongside a multicenter non-randomized matched-  
114 controlled study, which was performed in the Netherlands. In this study, the care on hospital  
115 wards utilizing a mixed 'PA/MD model' (intervention group) was compared with the care on  
116 wards utilizing a solely 'MD model' (control group).<sup>12,13</sup>

117

#### 118 *MD model*

119 In the MD model, only MDs provide medical care for admitted patients at a specific hospital  
120 department. Most of them are junior or senior residents. The resident is physically present at  
121 the department each weekday and is the first point of access to medical care during office  
122 hours (MR model). Their work includes daily clinical care and patient management. The  
123 residents are supervised by attending physicians. In some cases, especially in smaller  
124 hospitals where often no residents are employed, the medical specialists provide all medical  
125 care for the admitted patients (MS model).<sup>13</sup>

126

#### 127 *PA/MD model*

128 In this model, the PAs who were employed at the wards are substitutes for the residents. Their  
129 tasks and responsibilities are largely comparable. PAs have the same authorizations as  
130 residents: they can make indications for treatment, perform predefined medical procedures  
131 and subscribe medication independently within their field of expertise.<sup>14</sup> We included two  
132 different models within the intervention group: a model in which PAs collaborate with

1  
2  
3 133 residents (mixed PA/MR model) and a model in which only PAs are the first point of access  
4  
5 134 to medical care (PA model). In both models, the PAs as well as the residents were supervised  
6  
7 135 by attending physicians.  
8

9 136

10  
11 137 Control wards were matched with the intervention wards on the basis of hospital type (i.e.  
12  
13 138 academic or non-academic) and medical specialty (i.e. a range of surgical and medical  
14  
15 139 specialties). No wards with general medicine were involved. Hospital wards were included in  
16  
17 140 the intervention group if the PA covered at least 51% of the available ward care hours per  
18  
19 141 week during dayshifts on weekdays. Wards were included in the control group if exclusively  
20  
21 142 MDs provided medical care. The primary analysis had patients' length of stay as primary  
22  
23 143 outcome. Further details of the study design have been described elsewhere.<sup>12</sup> The economic  
24  
25 144 analysis was conducted from a healthcare perspective, with a time frame from admission till  
26  
27 145 one month after discharge.  
28  
29  
30  
31

32 146

### 33 34 147 **Study population**

35  
36 148 This study focused on the patients admitted to the hospital wards. Exclusion criteria for  
37  
38 149 patients were: 1) Younger than 18 years; 2) Terminally ill; and 3) Receiving daycare. Daycare  
39  
40 150 was defined as hospital admissions that were intended to last 24 hours or less (observation  
41  
42 151 status).  
43  
44

45 152

### 46 47 153 **Health outcome**

48  
49 154 The primary health outcome in this evaluation is the QALY (quality-adjusted life years). A  
50  
51 155 QALY is a generic measure of disease burden.<sup>15</sup> QALYs were derived using the EuroQoL-5D  
52  
53 156 questionnaire (EQ-5D-3L)<sup>16</sup>, which is a widely used validated patient questionnaire  
54  
55 157 comprising five domains: mobility, self-care, usual activities, pain, and anxiety/depression.  
56  
57  
58  
59  
60

1  
2  
3 158 Each domain has three possible levels indicating; no problems, moderate problems or severe  
4  
5 159 problems. The EQ-5D-3L was assessed at three time points: at admission, discharge and one  
6  
7 160 month after discharge. We used the Dutch utility weight to calculate utilities.<sup>17</sup>  
8  
9  
10 161

## 11 162 **Cost outcomes**

12  
13  
14 163 The primary cost outcome was the sum of direct costs associated with the principal admission  
15  
16 164 and costs that occurred within one month after discharge that were potentially related to  
17  
18 165 hospital admission. Resources used during admission were extracted in detail at an individual  
19  
20 166 patient level from patient medical records and included laboratory tests, diagnostic tests,  
21  
22 167 medication and blood products. Also the frequency and type of consultations of health care  
23  
24 168 suppliers and the number of days of unplanned stay at ICU were derived from the medical  
25  
26 169 records. To minimize information bias, a random sample of 10% of the patient records per  
27  
28 170 ward was reassessed by a second researcher, who was blinded for the results from the initial  
29  
30 171 researcher. In case of an inter-rater agreement of less than 95%, the records of the total  
31  
32 172 sample were reassessed.  
33  
34  
35

36 173

37  
38 174 Personnel costs included the costs for the residents, PAs and medical specialist who were  
39  
40 175 primarily employed for medical care for the admitted patients. Also the costs for supervision  
41  
42 176 time by attending physicians were included. We measured the number of hours spent for  
43  
44 177 medical ward care per professional by examination of work schedules. All MDs and PAs who  
45  
46 178 had the primary task to provide medical care for admitted patients were asked to fill in their  
47  
48 179 real work schedule during four fixed weeks: week 3, 7, 11 and 15 after the start of the  
49  
50 180 inclusion of patients. Next, we divided the number of working hours by the number of  
51  
52 181 patients for which they were in charge. The number of hours spent for supervision was  
53  
54 182 derived from an online questionnaire. We asked each attending physician for the average  
55  
56  
57  
58  
59  
60

1  
2  
3 183 number of hours they weekly spend for supervision. These hours were added up for all  
4  
5 184 attending physicians of the department, and divided by the number of patients who were  
6  
7 185 admitted at the ward.  
8

9  
10 186

11 187 Volumes which were measured between discharge and one month afterwards included days of  
12  
13 188 unplanned readmission, number of presentations at emergency departments, number of  
14  
15 189 contacts with a general practitioner, and the required home care. These volumes were  
16  
17 190 collected from a patient questionnaire that was sent one month after discharge. We chose for 1  
18  
19 191 month after discharge, as events happened after that period are less likely to be related to the  
20  
21 192 initial admission period.<sup>18</sup> Costs were calculated by multiplying the volumes of healthcare use  
22  
23 193 with corresponding unit prices, derived from the Dutch Manual for Costing Research.<sup>19</sup> All  
24  
25 194 figures were related to the price level of the same year (i.e. 2014). Details of the costs applied  
26  
27 195 to units of resource use are provided in supplementary table S1.  
28  
29  
30  
31

32 196

### 33 34 197 **Sample size calculation**

35  
36 198 Sample size calculation was based on length of stay (LOS), which was the primary clinical  
37  
38 199 outcome of the multicenter study. Results for LOS have been published elsewhere.<sup>11</sup> The  
39  
40 200 originally published sample size calculation<sup>12</sup> was adjusted prior to start of data collection.<sup>20</sup>  
41  
42 201 To detect a relative difference in LOS of 20% between the 'PA/MD model' and 'MD model',  
43  
44 202 assuming an average LOS of 6 days (SD 4.9), alpha 5%, power 80% and an Intra Cluster  
45  
46 203 Coefficient of 0.06 for patients in same ward, 30 wards including 100 patients each were  
47  
48 204 required. Taking into account an expected drop-out of maximum 2 matched pairs, 34 wards  
49  
50 205 (17 in each arm) with each 100 patients were required. In case of no drop-out, 50 patients per  
51  
52 206 ward would be sufficient.  
53  
54  
55

56 207  
57  
58  
59  
60

1  
2  
3 208 **Data analysis**  
4

5 209 We used descriptive analyses with counts (and proportions) or means (with SDs) to describe  
6  
7 210 baseline characteristics, effects, and costs. The a priori planned analysis was a comparison  
8  
9 211 between the intervention and control group on incremental costs and incremental effects. The  
10  
11 212 incremental effects were analyzed using a linear mixed model approach with the QALY score  
12  
13 213 as dependent variable and group and baseline QALY as independent variables, taking  
14  
15 214 clustering of patients within wards into account. If similar effects on the QALY in both  
16  
17 215 groups were found, a cost-minimization approach was performed by comparing differences in  
18  
19 216 costs between groups using a linear mixed model approach accounting for clustering and  
20  
21 217 applying bootstrapping (200 times) to create bias-corrected 95% CIs around the coefficients  
22  
23 218 of the independent variables. A total of 50–200 replications are generally adequate for  
24  
25 219 estimates of standard error.<sup>21</sup> Multivariable models were constructed to adjust for potential  
26  
27 220 confounders. We took matching into account by adding covariables for the matching  
28  
29 221 variables.  
30  
31  
32

33  
34 222

35  
36 223 Missing data were imputed via multiple imputations, which was embedded within the  
37  
38 224 statistical package. To explore uncertainty around costing assumptions (i.e. cost-prices and  
39  
40 225 salary), sensitivity analysis was conducted on the range of extremes. Imputation models for all  
41  
42 226 cost categories and utility scores were then redone accounting for changes in the sensitivity  
43  
44 227 analysis. To explore heterogeneity within the results, post-hoc subgroup analyses were  
45  
46 228 performed for each submodel of medical ward care, i.e. 1) the MS model: medical specialists  
47  
48 229 are in charge of all admitted patients; 2) MR model: residents or junior doctors are in charge  
49  
50 230 of all admitted patients; 3) mixed PA/MR model: both residents and PAs are in charge of the  
51  
52 231 admitted patients; 4) PA model: PAs are in charge of all admitted patients.<sup>13</sup> All analyses were  
53  
54  
55  
56  
57  
58  
59  
60

1  
2  
3 232 carried out with Stata 11.2 (StataCorp, College Station, TX). P-value was set at 0.05 to  
4  
5 233 indicate statistical significance.

6  
7 234

8  
9  
10 235 **Ethical considerations**

11 236 Ethical approval was received from the Research Ethics Committee of the Radboud university  
12  
13 237 medical center, Nijmegen (registration number: 2012/306); the committee judged that ethical  
14  
15 238 approval was not required under Dutch Law. All data were handled strictly confidential and  
16  
17 239 written informed consent was obtained from all patients.

18  
19  
20 240

21  
22  
23 241 **RESULTS**

24  
25 242 Between April 2013 and May 2015 we included 1,021 patients spread over 17 hospital wards  
26  
27 243 in the intervention group, and 1,286 patients spread over 17 hospital wards in the control  
28  
29 244 group (Figure 1). In total, 23 hospitals across the Netherlands were involved. More patients in  
30  
31 245 the intervention group were acutely admitted (59% versus 44% in the control group,  $p < 0.01$ ).  
32  
33 246 Also medical specialty, hospital type, primary diagnosis and discharge destination differed  
34  
35 247 significantly between the groups (table 1).

36  
37  
38 248

39  
40 249 **Health outcomes**

41  
42 250 We had complete QALY data for 779 patients in the intervention group (76%) and 982  
43  
44 251 patients in the control group (76%). Utilities related to the three time points and QALYs are  
45  
46 252 outlined in table 2. The EQ-5D utilities did not statistically significantly differ between the  
47  
48 253 study arms at baseline and throughout the study. At discharge and one month after discharge  
49  
50 254 the mean difference in EQ-5D utility was -0.01 (95% CI -0.06-0.04,  $p = 0.634$ ) respectively -  
51  
52 255 0.04 (95% CI -0.09-0.02,  $p = 0.178$ ), corrected for baseline utility. Similarly, the difference in  
53  
54 256 QALY gain was not statistically significant during admission nor after discharge.

1  
2  
3 2574  
5 258 **Resource use and costs**

6  
7 259 Ninety-nine percent of all patient records were assessed. Item-missing varied from 2%  
8  
9 260 (unplanned transfer to ICU) to 9% (use of blood products). Resource use after discharge was  
10  
11 261 derived from the questionnaire which was send to the patient one month after discharge. The  
12  
13 262 response rate on this questionnaire was 76% in both study arms. Resources used during the  
14  
15 263 period from admission till one month after discharge are summarized in supplemental table 2.

16  
17 264

18  
19  
20 265 Table 3 outlines total costs per patient and costs per item. Mean total costs per patient in the  
21  
22 266 intervention group did not significantly differ from the mean costs per patient in the control  
23  
24 267 group: mean difference was €568 (95% CI €-254-€1391, p=0.175). Regarding the costs per  
25  
26 268 item, we found significant differences of €309 per patient (95% CI €29-€588, p=0.030)  
27  
28 269 regarding LOS in favor of the MD model. Personnel costs for the PA or MD who is primarily  
29  
30 270 responsible for the medical care at the ward was significantly lower on the wards in the  
31  
32 271 PA/MD model: mean difference €-11 (95% CI €-16- €-6, p<0.01) per patient. Costs for  
33  
34 272 supervision by the staff physicians were significantly higher in the PA/MD model: mean  
35  
36 273 difference €43 (95% CI €39-€47, p<0.01). Since the MD model also incorporates wards with  
37  
38 274 only medical specialists, supervision is not applicable for these wards. To rule out this  
39  
40 275 distortion we performed an additional analysis in which we excluded the 4 wards with only  
41  
42 276 medical specialists. This resulted in an opposite difference: costs for supervision were now  
43  
44 277 significantly lower for the PA/MD model compared to the MD models: mean difference € -11  
45  
46 278 (€-16- €-6, p<0.01).

47  
48 279 Sensitivity analyses on the range of extremes did not change these results of the total costs  
49  
50 280 and costs per item substantially (data not shown, but can be provided on request).

51  
52 281  
53  
54  
55  
56  
57  
58  
59  
60



## 282 Subgroup analyses

283 Results for the analyses per submodel of medical ward care are shown in table 4. Mean total  
284 costs per patient did not significantly differ among the submodels. Costs for LOS were on  
285 average 465 euro per patient (95% CI -920- -10,  $P=0.045$ ) lower in the MS model than in the  
286 mixed PA/MR model. The other models did not significantly differ from each other.  
287 Personnel costs for the provider who is primarily responsible for the medical care at the ward  
288 was significantly highest in the MS model (mean €129 (SD €37)), and lowest in the PA model  
289 (mean €51 (SD €3)). Costs for supervision were significantly highest in the MR model (mean  
290 €178 (SD €79)) and lowest in the PA model (mean €121 (SD €59)). We also found significant  
291 differences regarding costs for blood products and required home care: these were highest in  
292 the PA model.

## 294 DISCUSSION

295 This study aimed to determine the cost-effectiveness of substitution of inpatient care from  
296 MDs to PAs. No significant difference between the two study arms was found on QALY and  
297 total costs. Explorative analyses showed a significant difference in costs for LOS in favor of  
298 the MD model, and significant differences regarding personnel costs in favor of the PA/MD  
299 model.

300  
301 To our knowledge, this is the first multicenter study that investigated the cost implications of  
302 reallocating inpatient care from MDs to PAs. A few single-centered studies have compared  
303 costs of non-acute inpatient care delivered by a PA-based team with care delivered by a  
304 resident-based team.<sup>9,10</sup> These studies did not measure QALYs. Results regarding total costs  
305 were mixed. Roy et al.<sup>9</sup> reported that the care by the PA-based team was associated with  
306 lower total costs per patient, while Singh et al.<sup>10</sup> reported similar costs between the study

1  
2  
3 307 arms. These studies can however hardly be compared with our study, because different  
4  
5 308 methods to estimate costs were used and the settings were different. In addition, most of these  
6  
7 309 studies compared a hospitalist/PA model with the traditional resident-based model, while  
8  
9 310 hospitalists were not part of the models we used.<sup>13</sup>  
10

11  
12 311

13  
14 312 Our previous analysis showed increased provider continuity at the ward with the presence of a  
15  
16 313 PA.<sup>13</sup> This study shows that this increased continuity did not cause a decrease in costs,  
17  
18 314 especially because of the higher costs for LOS. Subgroup analysis showed that costs for LOS  
19  
20 315 were especially higher when compared to the model in which only medical specialists were  
21  
22 316 involved. Costs did not significantly differ between the PA models and the model which  
23  
24 317 involves only residents (MR model). An explanation for the lower costs for LOS in the MS  
25  
26 318 model might be that the medical specialists have more work experience. The PA profession is  
27  
28 319 relatively new; most of them have a short time of experience compared to medical  
29  
30 320 specialists.<sup>13</sup> Over time the clinical experience of PAs will become larger, which may lead to  
31  
32 321 lower costs. Besides, we cannot exclude the possibility that the lower LOS indicates that the  
33  
34 322 patients which were included in the MS model were overall less complex than the patients in  
35  
36 323 the other models. Although we've adjusted for relevant confounders in the multivariable  
37  
38 324 analysis, it is not possible to perfectly adjust for the complexity of the patient in non-  
39  
40 325 randomized comparisons.  
41  
42  
43  
44  
45  
46

47 326

48 327 Personnel costs for the provider who is primarily responsible for the medical care at the ward  
49  
50 328 were significantly lower on the wards with the PA/MD model when compared to the MD  
51  
52 329 model. Subgroup analysis showed highest costs on the wards with only medical specialists.  
53  
54 330 This can be explained by the significant higher salary. Besides, we found lower costs on  
55  
56 331 wards with the PA model when compared to the model which involves only residents. Since  
57  
58  
59  
60

1  
2  
3 332 in the Netherlands the salary of PAs is comparable to the salary of residents (table S1), the  
4  
5 333 significant difference can be explained by our finding that on the wards with the PA/MD  
6  
7 334 model, less time was spend per patient (table S2). This is probably caused by the finding of  
8  
9 335 our previous study that PAs spend less time on indirect inpatient care than residents do.<sup>13</sup> A  
10  
11 336 hypothesis is that since PAs tend to work for a longer time at the hospital ward, they might be  
12  
13 337 more familiar with the clinical protocols and the procedures, for example when requesting  
14  
15 338 diagnostic tests and consultation of other physicians. Also the increased provider continuity  
16  
17 339 might lead to more efficient care.<sup>13</sup>  
18  
19

20  
21 340

22  
23 341 In our initial analysis, costs for supervision were significantly higher in the PA/MD model  
24  
25 342 when compared to the MD model. However, this finding was biased by the wards with only  
26  
27 343 medical specialists, since supervision was not applicable for these wards. Costs for  
28  
29 344 supervision were higher on the wards with the mixed PA/MR model and the MR model when  
30  
31 345 compared to the PA model. An explanation might be the fact that the PAs in the PA model  
32  
33 346 have more work experience than the PAs and residents in the other models.<sup>13</sup> An alternative  
34  
35 347 hypothesis is that the difference is caused by the teaching culture of the wards. 83% of all  
36  
37 348 included wards with a mixed PA/MR model and 69% of all wards with the MR model are  
38  
39 349 from teaching centers, while none of the wards with the PA model are.<sup>13</sup> As a consequence,  
40  
41 350 there might be more consultation between professionals and more emphasize on education,  
42  
43 351 which could be included in the supervision hours.  
44  
45  
46

47 352

48  
49 353 This study suggests that the cost-effectiveness of inpatient care delivered by a PA-based team  
50  
51 354 is comparable to that of residents-based teams. This does not confirm the findings from  
52  
53 355 qualitative studies, in which medical specialists experienced an increased efficiency after  
54  
55 356 employing PAs.<sup>5,22,23</sup> However, the effectiveness which was experienced by the interviewed  
56  
57  
58  
59  
60

1  
2  
3 357 providers in our own qualitative study was based on items which were not in the scope of this  
4  
5 358 quantitative research.<sup>5</sup> Several interviewees experienced increased effectiveness because the  
6  
7 359 PA performs additional tasks which were normally the responsibility of the staff physicians or  
8  
9 360 residents, like integrating newly employed doctors, performing specific (complex) medical  
10  
11 361 procedures, providing education or conducting quality projects. As a consequence, staff  
12  
13 362 physicians and residents can be employed more effectively in for example providing outpatient  
14  
15 363 care or conducting surgery. Besides, residents experience increased effectiveness because  
16  
17 364 they have more time to focus on the needs for their own education.  
18  
19  
20

21 365  
22  
23 366 This economic evaluation was conducted from a health care perspective. The societal  
24  
25 367 perspective was not taken into account. For example, educational costs for PA students are  
26  
27 368 thought to be lower than educational costs for medical students, since the vocational training  
28  
29 369 programs take 2.5 and 6 years respectively. Exact costs for training PA students are however  
30  
31 370 hard to determine, because Dutch PA students have already obtained a healthcare related  
32  
33 371 Bachelor's degree of 4 years and have at least 2 years of clinical work experience in the  
34  
35 372 healthcare domain.<sup>24</sup> Besides, since the PA education is a shortened form of the traditional  
36  
37 373 medical education, it is thought that policy makers can respond quicker on the frequently  
38  
39 374 changing demand for medical professionals within healthcare organizations. Another value  
40  
41 375 from the social perspective might be that becoming a PA is an interesting opportunity for  
42  
43 376 nurses and other health care providers wanting to advance their career.<sup>25,26</sup> As a consequence,  
44  
45 377 motivated employees can be saved for the healthcare workforce.  
46  
47  
48

49 378  
50  
51 379 Several strengths and limitations have to be mentioned. A strength is the multicenter design,  
52  
53 380 which increases the generalizability of our findings. We included a broad range of clinical  
54  
55 381 disciplines from different types of hospitals. A limitation is the non-randomized design.  
56  
57  
58  
59  
60

1  
2  
3 382 Different from other countries, the Dutch PA programs incorporate a dual work-education  
4  
5 383 model, which means that students are employed within a particular medical specialty from the  
6  
7 384 day of their enrollment in the master's PA program.<sup>24,27</sup> After graduation, the majority  
8  
9 385 continue their employment at the same department. The suggestion of randomly relocating the  
10  
11 386 graduated PA to another hospital ward could lead to resistance among the staff physicians  
12  
13 387 who put considerable effort in the training. The non-randomized character of this study does  
14  
15 388 imply an increased risk for confounding, which we accounted for in the multivariable  
16  
17 389 analyses. Besides, we tried to reduce heterogeneity within our data by conducting subgroup  
18  
19 390 analyses for the four models for medical ward care separately. However, we cannot exclude  
20  
21 391 that there are still local differences like policies about quality of care and patient case-mix  
22  
23 392 which still influence our results. Besides, the results of the subgroup analyses should be  
24  
25 393 interpreted with caution because of low numbers of patients per subgroup.  
26  
27  
28  
29  
30

394

### 395 **Conclusion**

396 This study suggests that the cost-effectiveness on wards managed by PAs, in collaboration  
397 with MDs, is similar to the care on wards with traditional house staffing by MDs only. The  
398 implementation of PAs may reduce personnel costs, but not overall healthcare costs.

1  
2  
3 399 **Funding statement**  
4

5 400 This work was funded by the Netherlands Organization for Health Research and Development  
6  
7 401 (ZonMw), grant number 171202006  
8

9 402

10  
11 403 **Competing interest**  
12

13 404 The authors declare that they have no competing interest  
14

15 405

16  
17  
18 406 **Data sharing statement**  
19

20 407 Data files are available from the authors on reasonable request.  
21

22 408

23  
24  
25 409 **Author's contributions**  
26

27 410 ML and MT are responsible for the design of the study with comments of AvV, MW, EA and  
28  
29 411 GvdB. MT is responsible for the data collection and data management with direct supervision  
30  
31 412 and feedback from ML. MT and EA conducted the data analyses. CvB, KvB, WB, LJ, AV  
32  
33 413 and FvdW were involved in the data collection of the study. MT wrote the first draft of the  
34  
35 414 manuscript and all other authors reviewed this critically. All authors read and approved the  
36  
37 415 final manuscript.  
38  
39

40 416

41  
42  
43 417 **Acknowledgments**  
44

45 418 We thank all professionals of the 34 Dutch hospital wards for participating in the study:  
46  
47 419 Bravis Hospital, Department of Orthopaedics; Canisius Wilhelmina Hospital, Department of  
48  
49 420 Surgery; Canisius Wilhelmina Hospital, Department of Gastroenterology; De Tjongerschans  
50  
51 421 Hospital, Department of Surgery; Elisabeth Hospital, Department of Surgery; Elkerliek  
52  
53 422 Hospital, Department of Surgery; Elkerliek Hospital, Department of Cardiology; Gelre  
54  
55 423 Hospital, Department of Pulmonology; Haga Hospital, Department of Surgery; Hospital  
56  
57  
58  
59  
60

1  
2  
3 424 Gelderse Vallei, Department of Surgery; Jeroen Bosch Hospital, Department of Surgery;  
4  
5 425 Jeroen Bosch Hospital, Department of Gastroenterology; Koningin Beatrix Hospital,  
6  
7 426 Department of Surgery; Laurentius Hospital, Department of Surgery; Laurentius Hospital,  
8  
9 427 Department of Gastroenterology; Medical Center Haaglanden, Department of Surgery; Orbis  
10  
11 428 Medical Center, Department of Surgery; Radboud university medical center, Department of  
12  
13 429 ENT, Head and Neck Surgical Oncology; Reinier de Graaf Gasthuis, Department of Surgery;  
14  
15 430 Rijnstate Hospital, Department of Gastroenterology; Scheper Hospital, Department of  
16  
17 431 Surgery; Slingeland Hospital, Department of Surgery; TweeSteden Hospital, Department of  
18  
19 432 Pulmonology; Van Weel Bethesda Hospital, Department of Surgery; UMC Cancer Center,  
20  
21 433 University Medical Center Utrecht, Department of Head and Neck Surgical Oncology;  
22  
23 434 VieCuri Medical Center Noord-Limburg, Department of Surgery; VieCuri Medical Center  
24  
25 435 Noord-Limburg, Department of Cardiology; VieCuri Medical Center Noord-Limburg,  
26  
27 436 Department of Pulmonology; VieCuri Medical Center Noord-Limburg, Department of  
28  
29 437 Orthopaedics.  
30  
31  
32  
33  
34 438 Second, we thank Irma Maassen and Yvonne Peters (research assistants, Radboud university  
35  
36 439 medical center, Scientific Center for Quality of healthcare) for executing many logistical  
37  
38 440 procedures. Third, we thank Reinier Akkermans (Radboud university medical center,  
39  
40 441 Scientific Center for Quality of healthcare), statistical expert, for his advice in data analysis.  
41  
42  
43 442  
44  
45  
46  
47  
48  
49  
50  
51  
52  
53  
54  
55  
56  
57  
58  
59  
60

443 **REFERENCES**

- 444 **1.** Cawley JF, Hooker RS. Physician assistants in American medicine: the half-century  
445 mark. *Am J Manag Care*. 2013;19(10):e333-341.
- 446 **2.** Ford WT, Britting LL. Nonphysician providers in the hospitalist model: a prescription  
447 for change and a warning about unintended side effects. *J Hosp Med*. 2010;5(2):99-  
448 102.
- 449 **3.** Hartsell Z. The emerging role of PAs in the hospitalist movement. *JAAPA*.  
450 2007;20(8):10.
- 451 **4.** Merkle F, Ritsema TS, Bauer S, et al. The physician assistant: Shifting the Paradigm  
452 of European medical practice? *HSR Proc Intensive Care Cardiovasc Anesth*.  
453 2011;3(4):255-262.
- 454 **5.** Timmermans MJ, van Vught AJ, Maassen IT, et al. Determinants of the sustained  
455 employment of physician assistants in hospitals: a qualitative study. *BMJ Open*.  
456 2016;6(11):e011949.
- 457 **6.** Dhuper S, Choksi S. Replacing an academic internal medicine residency program with  
458 a physician assistant--hospitalist model: a comparative analysis study. *Am J Med*  
459 *Qual*. 2009;24(2):132-139.
- 460 **7.** Oswanski MF, Sharma OP, Raj SS. Comparative review of use of physician assistants  
461 in a level I trauma center. *Am Surg*. 2004;70(3):272.
- 462 **8.** Nishimura RA, Linderbaum JA, Naessens JM, et al. A nonresident cardiovascular  
463 inpatient service improves residents' experiences in an academic medical center: a new  
464 model to meet the challenges of the new millennium. *Acad Med*. 2004;79(5):426-431.
- 465 **9.** Roy CL, Liang CL, Lund M, et al. Implementation of a physician assistant/hospitalist  
466 service in an academic medical center: impact on efficiency and patient outcomes. *J*  
467 *Hosp Med*. 2008;3(5):361-368.



- 1  
2  
3 468 **10.** Singh S, Fletcher KE, Schapira MM, et al. A comparison of outcomes of general  
4  
5 469 medical inpatient care provided by a hospitalist-physician assistant model vs a  
6  
7 470 traditional resident-based model. *J Hosp Med.* 2011;6(3):122-130.  
8  
9  
10 471 **11.** Timmermans MJC, Van Vught AJAH, Peters YAS, et al. The impact of the  
11  
12 472 implementation of physician assistants in inpatient care: a multicenter matched-  
13  
14 473 controlled study. *Submitted*  
15  
16 474 **12.** Timmermans MJ, van Vught AJ, Wensing M, et al. The effectiveness of substitution  
17  
18 475 of hospital ward care from medical doctors to physician assistants: a study protocol.  
19  
20 476 *BMC Health Serv Res.* 2014;14:43.  
21  
22  
23 477 **13.** Timmermans MJ, van Vught AJ, Van den Berg M, et al. Physician assistants in  
24  
25 478 medical ward care: a descriptive study of the situation in the Netherlands. *J Eval Clin*  
26  
27 479 *Pract.* 2015.  
28  
29  
30 480 **14.** De Bruijn-Geraets DP, Van Eijk-Hustings YJ, Vrijhoef HJ. Evaluating newly acquired  
31  
32 481 authority of nurse practitioners and physician assistants for reserved medical  
33  
34 482 procedures in the Netherlands: a study protocol. *J Adv Nurs.* 2014;70(11):2673-2682.  
35  
36 483 **15.** Drummond MF, Sculpher MJ, Torrance GW, O'Brien BJ, Stoddart GL (2005)  
37  
38 484 *Methods for the economic evaluation of health care programmes.* (Third ed.) Oxford  
39  
40 485 University Press.  
41  
42  
43 486 **16.** EuroQol G. EuroQol--a new facility for the measurement of health-related quality of  
44  
45 487 life. *Health Policy.* 1990;16(3):199-208.  
46  
47  
48 488 **17.** Lamers LM, Stalmeier PF, McDonnell J, et al. [Measuring the quality of life in  
49  
50 489 economic evaluations: the Dutch EQ-5D tariff]. *Ned Tijdschr Geneesk.*  
51  
52 490 2005;149(28):1574-1578.  
53  
54 491 **18.** Halfon P, Egli Y, van Melle G, Chevalier J, Wasserfallen JB, Burnand B. Measuring  
55  
56 492 potentially avoidable hospital readmissions. *J Clin Epidemiol.* 2002; 55(6):573-87.  
57  
58  
59  
60

- 1  
2  
3 493 **19.** Hakkaer- van Roijen L, Tan S, Bouwmans CAM: Handleiding voor  
4  
5 494 Kostenonderzoek. Methoden en standaard kostprijzen voor economische evaluaties in  
6  
7 495 de gezondheidszorg. Rotterdam: Health care Insurance Council; 2015.  
8  
9  
10 496 **20.** Timmermans MJ, van Vught AJ, Wensing M, et al. Erratum to: The effectiveness of  
11  
12 497 substitution of hospital ward care from medical doctors to physician assistants: a study  
13  
14 498 protocol. *BMC Health Serv Res.* 2016;16(1):115.  
15  
16 499 **21.** Mooney CZ, Duval RD. Bootstrapping: A Nonparametric Approach to Statistical  
17  
18 500 Inference. London: SAGE Publications. 1993.  
19  
20  
21 501 **22.** Taylor MT, Wayne Taylor D, Burrows K, et al. Qualitative study of employment of  
22  
23 502 physician assistants by physicians: benefits and barriers in the Ontario health care  
24  
25 503 system. *Can Fam Physician.* 2013;59(11):e507-513.  
26  
27 504 **23.** White H, Round JE. Introducing physician assistants into an intensive care unit:  
28  
29 505 process, problems, impact and recommendations. *Clin Med (Lond).* 2013;13(1):15-18.  
30  
31 506 **24.** Spenkeliink-Schut G, Ten Cate OTJ, Kort HSM. Training the physician assistant in the  
32  
33 507 Netherlands. *J Physician Assist Educ.* 2008;19(4):46-53.  
34  
35 508 **25.** Niezen MG, Mathijssen JJ. Reframing professional boundaries in healthcare: a  
36  
37 509 systematic review of facilitators and barriers to task reallocation from the domain of  
38  
39 510 medicine to the nursing domain. *Health Policy.* 2014;117(2):151-169.  
40  
41 511 **26.** Zwijnenberg NC, Bours GJ. Nurse practitioners and physician assistants in Dutch  
42  
43 512 hospitals: their role, extent of substitution and facilitators and barriers experienced in  
44  
45 513 the reallocation of tasks. *J Adv Nurs.* 2012;68(6):1235-1246.  
46  
47  
48 514 **27.** Hooker RS, Kuilman L. Physician assistant education: five countries. *J Physician*  
49  
50 515 *Assist Educ.* 2011;22(1):53-58.  
51  
52  
53  
54 516  
55  
56  
57  
58  
59  
60

## 517 TABLES

518

519 Table 1. Baseline characteristics of patients

| Baseline characteristic                                       | PA/MD model (n=1021) | MD model (n=1286) | P Value |
|---------------------------------------------------------------|----------------------|-------------------|---------|
| Medical specialty <i>n</i> (%)                                |                      |                   | <0.01   |
| Surgery                                                       | 601 (59%)            | 696 (54%)         |         |
| Gastroenterology                                              | 102 (10%)            | 181 (14%)         |         |
| Pulmonology                                                   | 91 (9%)              | 107 (8%)          |         |
| Cardiology                                                    | 101 (10%)            | 124 (10%)         |         |
| Orthopaedics                                                  | 103 (10%)            | 100 (8%)          |         |
| ENT, head and neck oncology surgery                           | 23 (2%)              | 78 (6%)           |         |
| Hospital type <i>n</i> (%)                                    |                      |                   | <0.01   |
| Teaching                                                      | 552 (54%)            | 709 (55%)         |         |
| Academic                                                      | 23 (2%)              | 78 (6%)           |         |
| Non-academic                                                  | 529 (52%)            | 631 (49%)         |         |
| Non-teaching                                                  | 469 (46%)            | 577 (45%)         |         |
| Gender, male <i>n</i> (%)                                     | 524 (53%)            | 682 (54%)         | 0.47    |
| Age, years <i>mean</i> ± <i>SD</i>                            | 64 ± 16              | 63 ± 15           | 0.11    |
| Major diagnoses <i>n</i> (%)                                  |                      |                   | <0.01   |
| Digestive system                                              | 204 (20%)            | 247 (19%)         |         |
| Circulatory system                                            | 158 (16%)            | 274 (22%)         |         |
| Neoplasms                                                     | 108 (11%)            | 195 (15%)         |         |
| Musculoskeletal system and connective tissue                  | 120 (12%)            | 119 (9%)          |         |
| Injury and poisoning                                          | 135 (13%)            | 80 (6%)           |         |
| Infectious and parasitic diseases                             | 59 (6%)              | 81 (6%)           |         |
| Respiratory system                                            | 51 (5%)              | 75 (6%)           |         |
| Symptoms                                                      | 61 (6%)              | 87 (7%)           |         |
| Charlson index for co-morbidity score <i>mean</i> ± <i>SD</i> | 1.1 ± 1.8 (43%)      | 1.1 ± 1.8 (44%)   | 0.65    |
| (% with score ≥1)                                             |                      |                   | 0.66    |
| Highest education <i>n</i> (%)                                |                      |                   | 0.15    |
| Low                                                           | 371 (38%)            | 422 (34%)         |         |
| Middle                                                        | 380 (39%)            | 489 (40%)         |         |
| High                                                          | 233 (24%)            | 328 (27%)         |         |
| Ethnicity, Dutch <i>n</i> (%)                                 | 976 (99%)            | 1212 (98%)        | 0.15    |
| Marital status <i>n</i> (%)                                   |                      |                   | 0.29    |
| No partner                                                    | 136 (14%)            | 167 (14%)         |         |
| Partner                                                       | 730 (74%)            | 949 (77%)         |         |
| Widow                                                         | 119 (12%)            | 125 (10%)         |         |
| Smoking status <i>n</i> (%)                                   |                      |                   | 0.65    |
| No, never smoked                                              | 325 (33%)            | 385 (31%)         |         |
| No, but ever smoked                                           | 494 (48%)            | 626 (50%)         |         |
| Yes, still smoking                                            | 174 (17%)            | 230 (19%)         |         |
| Body Mass Index ( <i>mean</i> ± <i>SD</i> )                   | 27 ± 5               | 27 ± 5            | 0.79    |
| Number of hospitalizations for same problem <i>n</i> (%)      |                      |                   | 0.20    |
| 1 hospitalization                                             | 580 (59%)            | 693 (56%)         |         |
| >1 hospitalization                                            | 403 (41%)            | 540 (44%)         |         |
| Type of admission <i>n</i> (%)                                |                      |                   | <0.01   |
| Elective                                                      | 402 (41%)            | 687 (56%)         |         |
| Urgent                                                        | 588 (59%)            | 547 (44%)         |         |
| Discharge destination <i>n</i> (%)                            |                      |                   | <0.01   |
| Home                                                          | 765 (90%)            | 965 (92%)         |         |
| Hospital                                                      | 12 (1%)              | 30 (3%)           |         |

|                                            |         |         |
|--------------------------------------------|---------|---------|
| Nursing home/rehabilitation center/hospice | 56 (7%) | 28 (3%) |
| Family relative                            | 18 (2%) | 25 (2%) |

---

Note: Numbers may not add up to the total because of missing values

520

For peer review only

521 Table 2. Utilities at admission, discharge and one month after discharge, and QALY gained

| Outcome                            | PA/MD model (n=1,015)<br>mean (SD)* | MD model (n=1,277)<br>mean (SD)* | Difference<br>mean (95% CI) | P Value |
|------------------------------------|-------------------------------------|----------------------------------|-----------------------------|---------|
| <b>EQ-5D</b>                       |                                     |                                  |                             |         |
| Baseline (admission)               | 0.64 (0.28)                         | 0.68 (0.29)                      | -0.04 (-0.12-0.03)          | 0.247   |
| Discharge                          | 0.71 (0.22)                         | 0.72 (0.23)                      | -0.01 (-0.06-0.04)          | 0.634   |
| One month after discharge          | 0.75 (0.23)                         | 0.78 (0.22)                      | -0.04 (-0.09-0.02)          | 0.178   |
| <b>QALY gain during admission</b>  | 0.07 (0.25)                         | 0.04 (0.25)                      | 0.03 (-0.02-0.08)           | 0.213   |
| <b>QALY gain after discharge**</b> | 0.04 (0.22)                         | 0.05 (0.21)                      | -0.02 (-0.07-0.02)          | 0.216   |

\*Values are summary estimates obtained by multiple imputation

\*\*Difference in QALY between 1 month after discharge and discharge, adjusted for baseline utility

522

523

524

525

526 Table 3. Total costs per patient and costs per item (€)

| Item                                                     | PA/MD model (n=1015)<br>mean (SD)* | MD model (n=1277)<br>mean (SD)* | Difference **<br>mean (95% CI) | P Value      |
|----------------------------------------------------------|------------------------------------|---------------------------------|--------------------------------|--------------|
| <b>Costs associated with principal admission</b>         |                                    |                                 |                                |              |
| Length of stay                                           | 1780 (1811)                        | 1421 (1210)                     | 309 (29-588)                   | 0.030        |
| Non-elective transfer to ICU                             | 333 (3267)                         | 182 (1761)                      | 105 (-262-473)                 | 0.575        |
| Resources used during admission                          |                                    |                                 |                                |              |
| Medication                                               | 344 (848)                          | 243 (748)                       | 99 (-9- 207)                   | 0.073        |
| Laboratory tests                                         | 107 (168)                          | 99 (136)                        | 19 (-16-44)                    | 0.366        |
| Diagnostic tests                                         | 163 (229)                          | 154 (235)                       | -1 (-44-42)                    | 0.970        |
| Blood products                                           | 31 (122)                           | 36 (117)                        | -12 (-37-14)                   | 0.371        |
| Consultation with health care suppliers                  |                                    |                                 |                                |              |
| Medical or surgical consultant                           | 30 (93)                            | 19 (47)                         | 4 (-6-13)                      | 0.437        |
| Paramedics and specialist nurses                         | 96 (159)                           | 73 (121)                        | 14 (-20- 48)                   | 0.429        |
| Personnel                                                |                                    |                                 |                                |              |
| PA/MD who is primarily responsible for medical care      | 71 (29)                            | 103 (44)                        | -31 (-33- -28)                 | < 0.01       |
| Supervision by staff physician                           | 156 (93)                           | 129 (104)                       | 43 (39- 47)                    | < 0.01       |
| <i>Exclusion of wards with staff physicians only</i>     | 156 (93)                           | 173 (77)                        | -11 (-16- -6)                  | < 0.01       |
| <b>Costs occurred during first month after discharge</b> |                                    |                                 |                                |              |
| Presentation at emergency department                     | 108 (182)                          | 114 (298)                       | -13 (-45-20)                   | 0.448        |
| Non-elective readmission                                 | 456 (1333)                         | 421 (1142)                      | 1 (-89-92)                     | 0.977        |
| Contact with general practitioner                        | 55 (73)                            | 53 (70)                         | 0 (-7-7)                       | 0.923        |
| Required home care                                       | 121 (248)                          | 98 (214)                        | 11 (-9-30)                     | 0.275        |
| <b>Total costs</b>                                       | <b>3480 (5196)</b>                 | <b>2869 (3260)</b>              | <b>568 (-254-1391)</b>         | <b>0.175</b> |

Abbreviations: PA = physician assistant; MD=medical doctor

\*Values are summary estimates obtained by multiple imputation

\*\*Difference in mean costs per patient in the PA/MD group minus the MD group with bootstrapped 95% CI, adjusted for medical specialty, hospital type, diagnosis, comorbidities, type of admission, discharge destination

527

528

529

530

531 Table 4. Costs (€) per patient per submodel of medical ward care

| Item                                                     | PA/MD model (n=1015)              |                                | MD model (n=1277)              |                                 | P Value **                                                                                                                       |
|----------------------------------------------------------|-----------------------------------|--------------------------------|--------------------------------|---------------------------------|----------------------------------------------------------------------------------------------------------------------------------|
|                                                          | PA/MR model (n=698)<br>mean (SD)* | PA model (n=317)<br>mean (SD)* | MR model (n=924)<br>mean (SD)* | MS model (n= 353)<br>mean (SD)* |                                                                                                                                  |
| <b>Costs associated with principal admission</b>         |                                   |                                |                                |                                 |                                                                                                                                  |
| Length of stay at the ward                               | 1921 (1949)                       | 1469 (1413)                    | 1557 (1335)                    | 1064 (675)                      | 1 vs 4: $P = 0.045$                                                                                                              |
| Non-elective transfer to ICU                             | 468 (3935)                        | 45 (494)                       | 249 (2072)                     | 17 (322)                        | NS                                                                                                                               |
| Resources use during admission                           |                                   |                                |                                |                                 |                                                                                                                                  |
| Medication                                               | 365 (943)                         | 297 (600)                      | 280 (869)                      | 130 (194)                       | NS                                                                                                                               |
| Laboratory tests                                         | 116 (167)                         | 85 (170)                       | 114 (149)                      | 58 (78)                         | NS                                                                                                                               |
| Diagnostic tests                                         | 202 (253)                         | 73 (121)                       | 152 (249)                      | 155 (195)                       | NS                                                                                                                               |
| Blood products                                           | 16 (89)                           | 61 (171)                       | 33 (130)                       | 42 (71)                         | 1 vs 2: $P < 0.01$<br>3 vs 2: $P < 0.01$                                                                                         |
| Consultation with health care suppliers                  |                                   |                                |                                |                                 |                                                                                                                                  |
| Medical or surgical consultant                           | 35 (108)                          | 18 (41)                        | 21 (50)                        | 11 (30)                         | NS                                                                                                                               |
| Paramedics and specialized nurses                        | 97 (175)                          | 94 (120)                       | 72 (130)                       | 73 (90)                         | NS                                                                                                                               |
| Personnel                                                |                                   |                                |                                |                                 |                                                                                                                                  |
| PA/MD who is primarily responsible for medical care      | 80 (31)                           | 51 (3)                         | 93 (42)                        | 129 (37)                        | 1 vs 4: $P < 0.01$<br>2 vs 4: $P < 0.01$<br>3 vs 4: $P < 0.01$<br>1 vs 3: $P < 0.01$<br>2 vs 3: $P < 0.01$<br>2 vs 1: $P < 0.01$ |
| Supervision by staff physician                           | 173 (100)                         | 121 (59)                       | 178 (79)                       | NA                              | 1 vs 3: $P = 0.019$<br>2 vs 3: $P < 0.01$<br>2 vs 1: $P < 0.01$                                                                  |
| <b>Costs occurred during first month after discharge</b> |                                   |                                |                                |                                 |                                                                                                                                  |
| Presentation at emergency department                     | 112 (182)                         | 101 (182)                      | 125 (296)                      | 88 (307)                        | NS                                                                                                                               |
| Non-elective readmission                                 | 455 (1176)                        | 467 (1647)                     | 438 (1054)                     | 388 (13564)                     | NS                                                                                                                               |
| Contact with general practitioner                        | 57 (75)                           | 53 (69)                        | 54 (72)                        | 51 (67)                         | NS                                                                                                                               |
| Required home care                                       | 109 (222)                         | 150 (298)                      | 104 (229)                      | 86 (174)                        | 2 vs 1: $P = 0.029$<br>2 vs 3: $P = 0.031$<br>2 vs 4: $P = 0.025$                                                                |
| <b>Total costs</b>                                       | 3807 (5997)                       | 2754 (2536)                    | 3154 (3625)                    | 2120 (1809)                     | NS                                                                                                                               |

Abbreviations: PA = physician assistant; MR=medical resident; MS=medical specialist; NS= not significant; NA= not applicable

\*Values are summary estimates obtained by multiple imputation

\*\*Only significant p-values are noted

532

533

534

1  
2  
3  
4  
5  
6  
7  
8  
9  
10  
11  
12  
13  
14  
15  
16  
17  
18  
19  
20  
21  
22  
23  
24  
25  
26  
27  
28  
29  
30  
31  
32  
33  
34  
35  
36  
37  
38  
39  
40  
41  
42  
43  
44  
45  
46  
47  
48  
49  
50  
51  
52  
53  
54  
55  
56  
57  
58  
59  
60

535 **FIGURES**

536

537 Figure 1. Flow-chart of patients

For peer review only

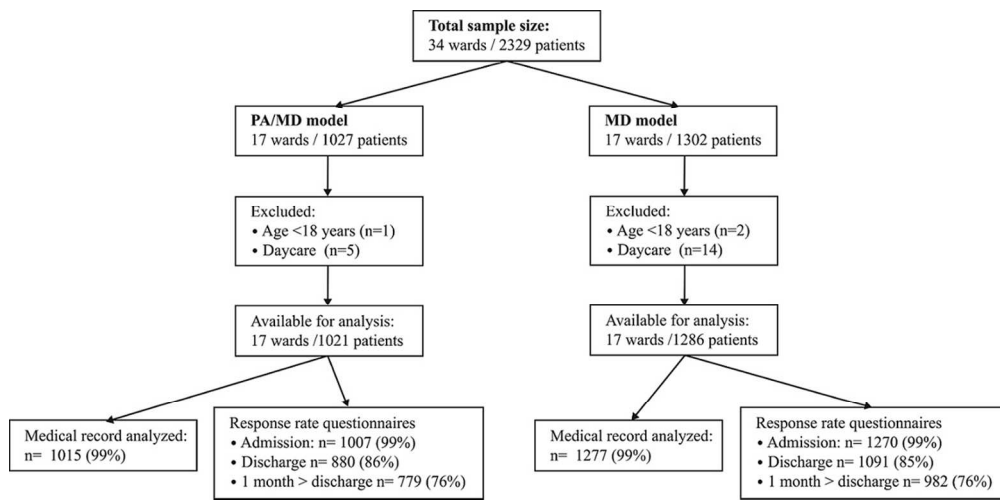

Figure 1. Flow-chart of patients

109x53mm (300 x 300 DPI)



Table S1. Details of the unit costs (year 2014) assigned to health care resource use data

| Health care use                                | Unit cost | Unit              | Details                                                                                           | Source                                                 |
|------------------------------------------------|-----------|-------------------|---------------------------------------------------------------------------------------------------|--------------------------------------------------------|
| <i>Admissions</i>                              |           |                   |                                                                                                   |                                                        |
| Ward                                           | €210      | Per day           | Average price, including overhead costs, but not personnel costs and costs regarding resource use | Dutch manual for costing <sup>1</sup>                  |
| Intensive care unit                            | €2015     | per day           | Average price per day including all costs: personnel, resource use, overhead                      | Dutch manual for costing <sup>1</sup>                  |
| <i>Resource use during admission</i>           |           |                   |                                                                                                   |                                                        |
| Medication                                     | Variable  | Per unit          | Minimum and maximum cost price, variable per type and dose of medicine                            | www.medicijnkosten.nl                                  |
| Laboratory tests                               | €1.77     | Per test          | Average price per laboratory test                                                                 | Dutch manual for costing <sup>1</sup>                  |
| Investigations. For example:                   | Variable  | Per investigation | Variable per type of investigation                                                                | The Dutch Healthcare Authority (NZA) <sup>2</sup>      |
| X-ray of the thorax                            | €55,81    | Per x-ray         | Fixed price established by the NZa                                                                | The Dutch Healthcare Authority (NZA) <sup>2</sup>      |
| CT scan of the abdomen                         | €234,57   | Per scan          | Fixed price established by the NZa                                                                | The Dutch Healthcare Authority (NZA) <sup>2</sup>      |
| MRI Cerebrum                                   | €253.89   | Per MRI           | Fixed price established by the NZa                                                                | The Dutch Healthcare Authority (NZA) <sup>2</sup>      |
| DEXA scan                                      | €109.09   | Per scan          | Fixed price established by the NZa                                                                | The Dutch Healthcare Authority (NZA) <sup>2</sup>      |
| <i>Blood products</i>                          |           |                   |                                                                                                   |                                                        |
| Erythrocytes                                   | €216      | Per unit (280 ml) | Fixed price, established by Sanquin Blood Supply                                                  | Dutch manual for costing <sup>1</sup>                  |
| Trombocytes                                    | €522      | Per unit (330 ml) | Fixed price, established by Sanquin Blood Supply                                                  | Dutch manual for costing <sup>1</sup>                  |
| Plasma                                         | €186      | Per unit (310 ml) | Fixed price, established by Sanquin Blood Supply                                                  | Dutch manual for costing <sup>1</sup>                  |
| <i>Consultation with health care suppliers</i> |           |                   |                                                                                                   |                                                        |
| Medical or surgical consultant                 | €27       | per consult       | Based on an assumed session time of 12 minutes                                                    | Dutch manual for costing <sup>1</sup>                  |
| Physiotherapist                                | €33       | per consult       | Based on an assumed session time of 30 minutes                                                    | Dutch manual for costing <sup>1</sup>                  |
| Occupation therapist                           | €33       | per consult       | Based on an assumed session time of 30 minutes                                                    | Dutch manual for costing <sup>1</sup>                  |
| Dietician                                      | €27       | per consult       | Based on an assumed session time of 30 minutes                                                    | Dutch manual for costing <sup>1</sup>                  |
| Speech therapist                               | €30       | per consult       | Based on an assumed session time of 30 minutes                                                    | Dutch manual for costing <sup>1</sup>                  |
| Social worker                                  | €30       | per consult       | Based on an assumed session time of 30 minutes                                                    | Financial department Radboud university medical center |
| Specialized nurse                              | €30,5     | per consult       | Based on an assumed session time of 30 minutes                                                    | Dutch manual for costing <sup>1</sup>                  |
| Psychologist                                   | €64       | per consult       | Based on an assumed session time of 60 minutes                                                    | Dutch manual for costing <sup>1</sup>                  |

| <i>Personnel</i>                                                |        |             |                                                                                                                                                                 |                                       |
|-----------------------------------------------------------------|--------|-------------|-----------------------------------------------------------------------------------------------------------------------------------------------------------------|---------------------------------------|
| PA/MD who is primarily responsible for medical care at the ward |        |             |                                                                                                                                                                 |                                       |
| Resident                                                        | €36.24 | per hour    | Based on a contract of 46 hours per week (including time for education), a salary of €4365 and 39% addition for honorarium, not including benefits and bonuses. | Dutch manual for costing <sup>1</sup> |
| Physician Assistant                                             | €39.82 | per hour    | Based on a contract of 36 hours per week, a salary of €3719 and 39% addition for honorarium, not including benefits and bonuses                                 | Dutch manual for costing <sup>1</sup> |
| Staff physician                                                 | €116   | per hour    | Based on an average salary, including honorariums                                                                                                               | Dutch manual for costing <sup>1</sup> |
| Supervision by staff physician                                  | €116   | per hour    | Based on an average salary, including honorariums                                                                                                               | Dutch manual for costing <sup>1</sup> |
| <i>Resource use during first month after discharge</i>          |        |             |                                                                                                                                                                 |                                       |
| Visit to emergency department                                   | €259   | per visit   | Average price per visit                                                                                                                                         | Dutch manual for costing <sup>1</sup> |
| Readmission                                                     | €476   | per day     | Average price including all costs, independent of type of medical specialty                                                                                     | Dutch manual for costing <sup>1</sup> |
| Contact with GP                                                 |        |             |                                                                                                                                                                 |                                       |
| GP surgery visit                                                | €33    | per consult | Based on a consult time of maximum 20 minutes                                                                                                                   | Dutch manual for costing <sup>1</sup> |
| GP home visit                                                   | €50    | per consult | Based on a consult time of maximum 20 minutes                                                                                                                   | Dutch manual for costing <sup>1</sup> |
| Phoned GP for advice                                            | €17    | per consult | Based on a consult time of maximum 10 minutes                                                                                                                   | Dutch manual for costing <sup>1</sup> |
| Consult at GP cooperative                                       | €87.41 | per consult | Average price per visit                                                                                                                                         | The Dutch Healthcare Authority (NZa)  |
| Required home care                                              |        |             |                                                                                                                                                                 |                                       |
| Nursing home care                                               | €73    | per hour    | Average price per hour                                                                                                                                          | Dutch manual for costing <sup>1</sup> |
| Domestic home care                                              | €23    | per hour    | Average price per hour                                                                                                                                          | Dutch manual for costing <sup>1</sup> |

Abbreviations: GP = General Practitioner

1. Hakkaer- van Roijen L, Tan S, Bouwmans CAM: Handleiding voor Kostenonderzoek. Methoden en standaard kostprijzen voor economische evaluaties in de gezondheidszorg. In. Rotterdam: Health care Insurance Council; 2015

2. <http://dbc-zorgproducten-tarieven.nza.nl/nzaZpTarief/ZoekfunctieDot.aspx>

Table S2. Resources use during admission and one month after discharge

| Item                                                                                              | PA/MD model<br>(n=1015)    | MD model<br>(n=1277)         |
|---------------------------------------------------------------------------------------------------|----------------------------|------------------------------|
| <b>Admission</b>                                                                                  |                            |                              |
| Length of stay<br><i>Days, median (IQR)</i>                                                       | 6 (4-10)                   | 5 (4-8)                      |
| Non-elective transfer to ICU<br><i>Days, median (IQR)</i><br><i>n/N (%)</i>                       | 0 (1-2)<br>19/987 (2%)     | 0 (1-1)<br>23/1242 (2%)      |
| <b>Resources use during admission</b>                                                             |                            |                              |
| Medication                                                                                        | Variable                   | Variable                     |
| Laboratory tests<br><i>Number of items analyzed, median (IQR)</i><br><i>n/N (%)</i>               | 31 (8-66)<br>870/954 (91%) | 34 (8-71)<br>1130/1254 (90%) |
| Diagnostic investigations<br><i>number of investigations, median (IQR)</i><br><i>n/N (%)</i>      | 1 (0-3)<br>692/932 (74%)   | 1 (0-2)<br>711/1143 (62%)    |
| Blood components<br><i>number of blood components, median (IQR)</i><br><i>n/N (%)</i>             | 0 (0-0)<br>64/998 (6%)     | 0 (0-0)<br>54/1097 (5%)      |
| <b>Consultation with health care suppliers during admission</b>                                   |                            |                              |
| Medical or surgical consultant<br><i>number of consultation, median (IQR)</i><br><i>n/N (%)</i>   | 0 (0-1)<br>281/912 (31%)   | 0 (0-0)<br>297/1256 (24%)    |
| Paramedics and specialist nurses<br><i>number of consultation, median (IQR)</i><br><i>n/N (%)</i> | 1 (0-4)<br>554/953 (58%)   | 0 (0-2)<br>612/1246 (49%)    |
| <b>Personnel</b>                                                                                  |                            |                              |
| PA/MD who is primarily responsible for medical care at the ward<br><i>hours, mean (SD)</i>        | 1.80 (0.93)                | 1.98 (1.60)                  |
| Supervision by staff physician<br><i>hours, mean (SD)</i>                                         | 1.34 (0.80)                | 1.11 (0.90)                  |
| <i>Exclusion of wards with staff physicians only</i>                                              | 1.34 (0.80)                | 1.53 (0.68)                  |
| <b>Resources use during first month after admission</b>                                           |                            |                              |
| Presentation at emergency department<br><i>number of presentations</i><br><i>n/N (%)</i>          | 0 (0-0)<br>119/743 (16%)   | 0 (0-0)<br>169/941 (18%)     |
| Non-elective readmission<br><i>Days, median (IQR)</i><br><i>n/N (%)</i>                           | 0 (0-0)<br>66/738 (9%)     | 0 (0-0)<br>77/935 (8%)       |
| Contact with general practitioner<br><i>number of contacts</i><br><i>n/N (%)</i>                  | 1 (0-2)<br>214/577 (54%)   | 1 (0-2)<br>394/702 (56%)     |
| Required nursing home care<br><i>Hours, median (IQR)</i><br><i>n/N (%)</i>                        | 0 (0-1)<br>97/589 (16%)    | 0 (0-0)<br>91/713 (13%)      |
| Required domestic home care<br><i>Hours, median (IQR)</i><br><i>n/N (%)</i>                       | 0 (0-0)<br>118/741 (16%)   | 0 (0-0)<br>169/941 (18%)     |

## CHEERS checklist—Items to include when reporting economic evaluations of health interventions

| Section/item                                           | Item No | Recommendation                                                                                                                                                                                                                                                                                                               | Reported on page No/ line No                              |
|--------------------------------------------------------|---------|------------------------------------------------------------------------------------------------------------------------------------------------------------------------------------------------------------------------------------------------------------------------------------------------------------------------------|-----------------------------------------------------------|
| <b>Title and abstract</b>                              |         |                                                                                                                                                                                                                                                                                                                              |                                                           |
| Title                                                  | 1       | Identify the study as an economic evaluation or use more specific terms such as “cost-effectiveness analysis”, and describe the interventions compared.                                                                                                                                                                      | page 1, line 1 to 2                                       |
| Abstract                                               | 2       | Provide a structured summary of objectives, perspective, setting, methods (including study design and inputs), results (including base case and uncertainty analyses), and conclusions.                                                                                                                                      | page 3, line 42 to 65                                     |
| <b>Introduction</b>                                    |         |                                                                                                                                                                                                                                                                                                                              |                                                           |
| Background and objectives                              | 3       | Provide an explicit statement of the broader context for the study.<br>Present the study question and its relevance for health policy or practice decisions.                                                                                                                                                                 | page 5, line 84 to 103<br>page 5, line 104 to 109         |
| <b>Methods</b>                                         |         |                                                                                                                                                                                                                                                                                                                              |                                                           |
| Target population and subgroups                        | 4       | Describe characteristics of the base case population and subgroups analysed, including why they were chosen.                                                                                                                                                                                                                 | page 7, line 148 to 152;<br>page 10, line 228 to 232;     |
| Setting and location                                   | 5       | State relevant aspects of the system(s) in which the decision(s) need(s) to be made.                                                                                                                                                                                                                                         | page 6, line 113 to page 7, line 145                      |
| Study perspective                                      | 6       | Describe the perspective of the study and relate this to the costs being evaluated.                                                                                                                                                                                                                                          | page 7, line 144;<br>page 8, line 162 to page 9, line 194 |
| Comparators                                            | 7       | Describe the interventions or strategies being compared and state why they were chosen.                                                                                                                                                                                                                                      | page 6, line 118 to page 7, line 135;                     |
| Time horizon                                           | 8       | State the time horizon(s) over which costs and consequences are being evaluated and say why appropriate.                                                                                                                                                                                                                     | page 7, line 145-146                                      |
| Discount rate                                          | 9       | Report the choice of discount rate(s) used for costs and outcomes and say why appropriate.                                                                                                                                                                                                                                   | page 9, line 193 to 196 and supplemental table 1          |
| Choice of health outcomes                              | 10      | Describe what outcomes were used as the measure(s) of benefit in the evaluation and their relevance for the type of analysis performed.                                                                                                                                                                                      | page 7, line 154 to page 8, line 161                      |
| Measurement of effectiveness                           | 11a     | <i>Single study-based estimates</i> : Describe fully the design features of the single effectiveness study and why the single study was a sufficient source of clinical effectiveness data.                                                                                                                                  | page 16, line 381 to page 17, line 395                    |
|                                                        | 11b     | <i>Synthesis-based estimates</i> : Describe fully the methods used for identification of included studies and synthesis of clinical effectiveness data.                                                                                                                                                                      |                                                           |
| Measurement and valuation of preference based outcomes | 12      | If applicable, describe the population and methods used to elicit preferences for outcomes.                                                                                                                                                                                                                                  | not applicable                                            |
| Estimating resources and costs                         | 13a     | <i>Single study-based economic evaluation</i> : Describe approaches used to estimate resource use associated with the alternative interventions. Describe primary or secondary research methods for valuing each resource item in terms of its unit cost. Describe any adjustments made to approximate to opportunity costs. |                                                           |

| Section/item                         | Item No | Recommendation                                                                                                                                                                                                                                                                                                                                        | Reported on page No/ line No                                            |
|--------------------------------------|---------|-------------------------------------------------------------------------------------------------------------------------------------------------------------------------------------------------------------------------------------------------------------------------------------------------------------------------------------------------------|-------------------------------------------------------------------------|
|                                      | 13b     | <i>Model-based economic evaluation:</i> Describe approaches and data sources used to estimate resource use associated with model health states. Describe primary or secondary research methods for valuing each resource item in terms of its unit cost. Describe any adjustments made to approximate to opportunity costs.                           | page 7, line 144; page 8, line 163 to page 9, line 196                  |
| Currency, price date, and conversion | 14      | Report the dates of the estimated resource quantities and unit costs. Describe methods for adjusting estimated unit costs to the year of reported costs if necessary. Describe methods for converting costs into a common currency base and the exchange rate.                                                                                        | Page 9, line 193-196 and supplemental table 1                           |
| Choice of model                      | 15      | Describe and give reasons for the specific type of decision-analytical model used. Providing a figure to show model structure is strongly recommended.                                                                                                                                                                                                | Page 10, line 212-222                                                   |
| Assumptions                          | 16      | Describe all structural or other assumptions underpinning the decision-analytical model.                                                                                                                                                                                                                                                              | Page 10, line 212-229                                                   |
| Analytical methods                   | 17      | Describe all analytical methods supporting the evaluation. This could include methods for dealing with skewed, missing, or censored data; extrapolation methods; methods for pooling data; approaches to validate or make adjustments (such as half cycle corrections) to a model; and methods for handling population heterogeneity and uncertainty. | Page 10, line 209-235                                                   |
| <b>Results</b>                       |         |                                                                                                                                                                                                                                                                                                                                                       |                                                                         |
| Study parameters                     | 18      | Report the values, ranges, references, and, if used, probability distributions for all parameters. Report reasons or sources for distributions used to represent uncertainty where appropriate. Providing a table to show the input values is strongly recommended.                                                                                   | Page 11, line 251 to page 12, line 283<br>table 1<br>table 2<br>table 3 |
| Incremental costs and outcomes       | 19      | For each intervention, report mean values for the main categories of estimated costs and outcomes of interest, as well as mean differences between the comparator groups. If applicable, report incremental cost-effectiveness ratios.                                                                                                                | Page 11, line 251 to page 12, line 283<br>table 2<br>table 3<br>table 4 |
| Characterising uncertainty           | 20a     | <i>Single study-based economic evaluation:</i> Describe the effects of sampling uncertainty for the estimated incremental cost and incremental effectiveness parameters, together with the impact of methodological assumptions (such as discount rate, study perspective).                                                                           |                                                                         |
|                                      | 20b     | <i>Model-based economic evaluation:</i> Describe the effects on the results of uncertainty for all input parameters, and uncertainty related to the structure of the model and assumptions.                                                                                                                                                           | Page 11, line 251 to page 12, line 283<br>table 2<br>table 3<br>table 4 |
| Characterising heterogeneity         | 21      | If applicable, report differences in costs, outcomes, or cost-effectiveness that can be explained by variations between subgroups of patients with different baseline characteristics or other observed variability in effects that are not reducible by more information.                                                                            | Page 13, line 284-294                                                   |
| <b>Discussion</b>                    |         |                                                                                                                                                                                                                                                                                                                                                       |                                                                         |

| Section/item                                                         | Item No | Recommendation                                                                                                                                                                                                                                    | Reported on page No/ line No              |
|----------------------------------------------------------------------|---------|---------------------------------------------------------------------------------------------------------------------------------------------------------------------------------------------------------------------------------------------------|-------------------------------------------|
| Study findings, limitations, generalisability, and current knowledge | 22      | Summarise key study findings and describe how they support the conclusions reached. Discuss limitations and the generalisability of the findings and how the findings fit with current knowledge.                                                 | Page 13, line 297 to<br>Page 17, line 400 |
| <b>Other</b>                                                         |         |                                                                                                                                                                                                                                                   |                                           |
| Source of funding                                                    | 23      | Describe how the study was funded and the role of the funder in the identification, design, conduct, and reporting of the analysis. Describe other non-monetary sources of support.                                                               | Page 18, line 401-403                     |
| Conflicts of interest                                                | 24      | Describe any potential for conflict of interest of study contributors in accordance with journal policy. In the absence of a journal policy, we recommend authors comply with International Committee of Medical Journal Editors recommendations. | Page 18. Line 405-406                     |

For consistency, the CHEERS statement checklist format is based on the format of the CONSORT statement checklist
