# Supplementary material for: The involvement of physician assistants in inpatient care in hospitals in the Netherlands: a cost-effectiveness analysis
Source: PubMed Central journal article supplement — BMJ Open. 2017 Jul 10;7(7):e016405. doi: 10.1136/bmjopen-2017-016405 (PMC5541617; doi:10.1136/bmjopen-2017-016405), 2017-07-10
Supplement: bmjopen-2017-016405supp001.pdf [file bmjopen-2017-016405supp001.pdf]

**Table S1. Details of the unit costs (year 2014) assigned to health care resource use data**

| <b>Health care use</b>                         | <b>Unit cost</b> | <b>Unit</b>       | <b>Details</b>                                                                                    | <b>Source</b>                                          |
|------------------------------------------------|------------------|-------------------|---------------------------------------------------------------------------------------------------|--------------------------------------------------------|
| <i>Admissions</i>                              |                  |                   |                                                                                                   |                                                        |
| Ward                                           | €210             | Per day           | Average price, including overhead costs, but not personnel costs and costs regarding resource use | Dutch manual for costing <sup>1</sup>                  |
| Intensive care unit                            | €2015            | per day           | Average price per day including all costs: personnel, resource use, overhead                      | Dutch manual for costing <sup>1</sup>                  |
| <i>Resource use during admission</i>           |                  |                   |                                                                                                   |                                                        |
| Medication                                     | Variable         | Per unit          | Minimum and maximum cost price, variable per type and dose of medicine                            | www.medicijnkosten.nl                                  |
| Laboratory tests                               | €1.77            | Per test          | Average price per laboratory test                                                                 | Dutch manual for costing <sup>1</sup>                  |
| Investigations. For example:                   | Variable         | Per investigation | Variable per type of investigation                                                                | The Dutch Healthcare Authority (NZA) <sup>2</sup>      |
| X-ray of the thorax                            | €55,81           | Per x-ray         | Fixed price established by the NZa                                                                | The Dutch Healthcare Authority (NZA) <sup>2</sup>      |
| CT scan of the abdomen                         | €234,57          | Per scan          | Fixed price established by the NZa                                                                | The Dutch Healthcare Authority (NZA) <sup>2</sup>      |
| MRI Cerebrum                                   | €253.89          | Per MRI           | Fixed price established by the NZa                                                                | The Dutch Healthcare Authority (NZA) <sup>2</sup>      |
| DEXA scan                                      | €109.09          | Per scan          | Fixed price established by the NZa                                                                | The Dutch Healthcare Authority (NZA) <sup>2</sup>      |
| <i>Blood products</i>                          |                  |                   |                                                                                                   |                                                        |
| Erythrocytes                                   | €216             | Per unit (280 ml) | Fixed price, established by Sanquin Blood Supply                                                  | Dutch manual for costing <sup>1</sup>                  |
| Trombocytes                                    | €522             | Per unit (330 ml) | Fixed price, established by Sanquin Blood Supply                                                  | Dutch manual for costing <sup>1</sup>                  |
| Plasma                                         | €186             | Per unit (310 ml) | Fixed price, established by Sanquin Blood Supply                                                  | Dutch manual for costing <sup>1</sup>                  |
| <i>Consultation with health care suppliers</i> |                  |                   |                                                                                                   |                                                        |
| Medical or surgical consultant                 | €27              | per consult       | Based on an assumed session time of 12 minutes                                                    | Dutch manual for costing <sup>1</sup>                  |
| Physiotherapist                                | €33              | per consult       | Based on an assumed session time of 30 minutes                                                    | Dutch manual for costing <sup>1</sup>                  |
| Occupation therapist                           | €33              | per consult       | Based on an assumed session time of 30 minutes                                                    | Dutch manual for costing <sup>1</sup>                  |
| Dietician                                      | €27              | per consult       | Based on an assumed session time of 30 minutes                                                    | Dutch manual for costing <sup>1</sup>                  |
| Speech therapist                               | €30              | per consult       | Based on an assumed session time of 30 minutes                                                    | Dutch manual for costing <sup>1</sup>                  |
| Social worker                                  | €30              | per consult       | Based on an assumed session time of 30 minutes                                                    | Financial department Radboud university medical center |
| Specialized nurse                              | €30,5            | per consult       | Based on an assumed session time of 30 minutes                                                    | Dutch manual for costing <sup>1</sup>                  |
| Psychologist                                   | €64              | per consult       | Based on an assumed session time of 60 minutes                                                    | Dutch manual for costing <sup>1</sup>                  |

---

| <i>Personnel</i>                                                |        |             |                                                                                                                                                                  |                                       |
|-----------------------------------------------------------------|--------|-------------|------------------------------------------------------------------------------------------------------------------------------------------------------------------|---------------------------------------|
| PA/MD who is primarily responsible for medical care at the ward |        |             |                                                                                                                                                                  |                                       |
| Resident                                                        | €36.24 | per hour    | Based on a contract of 46 hours per week (including time for education) , a salary of €4365 and 39% addition for honorarium, not including benefits and bonuses. | Dutch manual for costing <sup>1</sup> |
| Physician Assistant                                             | €39.82 | per hour    | Based on a contract of 36 hours per week, a salary of €3719 and 39% addition for honorarium, not including benefits and bonuses                                  | Dutch manual for costing <sup>1</sup> |
| Staff physician                                                 | €116   | per hour    | Based on an average salary, including honorariums                                                                                                                | Dutch manual for costing <sup>1</sup> |
| Supervision by staff physician                                  | €116   | per hour    | Based on an average salary, including honorariums                                                                                                                | Dutch manual for costing <sup>1</sup> |
| <i>Resource use during first month after discharge</i>          |        |             |                                                                                                                                                                  |                                       |
| Visit to emergency department                                   | €259   | per visit   | Average price per visit                                                                                                                                          | Dutch manual for costing <sup>1</sup> |
| Readmission                                                     | €476   | per day     | Average price including all costs, independent of type of medical specialty                                                                                      | Dutch manual for costing <sup>1</sup> |
| Contact with GP                                                 |        |             |                                                                                                                                                                  |                                       |
| GP surgery visit                                                | €33    | per consult | Based on a consult time of maximum 20 minutes                                                                                                                    | Dutch manual for costing <sup>1</sup> |
| GP home visit                                                   | €50    | per consult | Based on a consult time of maximum 20 minutes                                                                                                                    | Dutch manual for costing <sup>1</sup> |
| Phoned GP for advice                                            | €17    | per consult | Based on a consult time of maximum 10 minutes                                                                                                                    | Dutch manual for costing <sup>1</sup> |
| Consult at GP cooperative                                       | €87.41 | per consult | Average price per visit                                                                                                                                          | The Dutch Healthcare Authority (NZa)  |
| Required home care                                              |        |             |                                                                                                                                                                  |                                       |
| Nursing home care                                               | €73    | per hour    | Average price per hour                                                                                                                                           | Dutch manual for costing <sup>1</sup> |
| Domestic home care                                              | €23    | per hour    | Average price per hour                                                                                                                                           | Dutch manual for costing <sup>1</sup> |

---

Abbreviations: GP = General Practitioner

1. Hakkaer- van Roijen L, Tan S, Bouwmans CAM: Handleiding voor Kostenonderzoek. Methoden en standaard kostprijzen voor economische evaluaties in de gezondheidszorg. In. Rotterdam: Health care Insurance Council; 2015

2. <http://dbc-zorgproducten-tarieven.nza.nl/nzaZpTarief/ZoekfunctieDot.aspx>
