# Supplementary material for: The involvement of physician assistants in inpatient care in hospitals in the Netherlands: a cost-effectiveness analysis
Source: PubMed Central journal article supplement — BMJ Open. 2017 Jul 10;7(7):e016405. doi: 10.1136/bmjopen-2017-016405 (PMC5541617; doi:10.1136/bmjopen-2017-016405), 2017-07-10
Supplement: bmjopen-2017-016405supp002.pdf [file bmjopen-2017-016405supp002.pdf]

**Table S2. Resources use during admission and one month after discharge**

| <b>Item</b>                                                                                                       | <b>PA/MD model<br/>(n=1015)</b> | <b>MD model<br/>(n=1277)</b> |
|-------------------------------------------------------------------------------------------------------------------|---------------------------------|------------------------------|
| <b>Admission</b>                                                                                                  |                                 |                              |
| Length of stay<br><i>Days, median (IQR)</i>                                                                       | 6 (4-10)                        | 5 (4-8)                      |
| Non-elective transfer to ICU<br><i>Days, median (IQR)</i><br><i>n/N (%)</i>                                       | 0 (1-2)<br>19/987 (2%)          | 0 (1-1)<br>23/1242 (2%)      |
| <b>Resources use during admission</b>                                                                             |                                 |                              |
| Medication                                                                                                        | Variable                        | Variable                     |
| Laboratory tests<br><i>Number of items analyzed, median (IQR)</i><br><i>n/N (%)</i>                               | 31 (8-66)<br>870/954 (91%)      | 34 (8-71)<br>1130/1254 (90%) |
| Diagnostic investigations<br><i>number of investigations, median (IQR)</i><br><i>n/N (%)</i>                      | 1 (0-3)<br>692/932 (74%)        | 1 (0-2)<br>711/1143 (62%)    |
| Blood components<br><i>number of blood components, median (IQR)</i><br><i>n/N (%)</i>                             | 0 (0-0)<br>64/998 (6%)          | 0 (0-0)<br>54/1097 (5%)      |
| <b>Consultation with health care suppliers during admission</b>                                                   |                                 |                              |
| Medical or surgical consultant<br><i>number of consultation, median (IQR)</i><br><i>n/N (%)</i>                   | 0 (0-1)<br>281/912 (31%)        | 0 (0-0)<br>297/1256 (24%)    |
| Paramedics and specialist nurses<br><i>number of consultation, median (IQR)</i><br><i>n/N (%)</i>                 | 1 (0-4)<br>554/953 (58%)        | 0 (0-2)<br>612/1246 (49%)    |
| <b>Personnel</b>                                                                                                  |                                 |                              |
| PA/MD who is primarily responsible for medical care at the ward<br><i>hours, mean (SD)</i>                        | 1.80 (0.93)                     | 1.98 (1.60)                  |
| Supervision by staff physician<br><i>hours, mean (SD)</i><br><i>Exclusion of wards with staff physicians only</i> | 1.34 (0.80)<br>1.34 (0.80)      | 1.11 (0.90)<br>1.53 (0.68)   |
| <b>Resources use during first month after admission</b>                                                           |                                 |                              |
| Presentation at emergency department<br><i>number of presentations</i><br><i>n/N (%)</i>                          | 0 (0-0)<br>119/743 (16%)        | 0 (0-0)<br>169/941 (18%)     |
| Non-elective readmission<br><i>Days, median (IQR)</i><br><i>n/N (%)</i>                                           | 0 (0-0)<br>66/738 (9%)          | 0 (0-0)<br>77/935 (8%)       |
| Contact with general practitioner<br><i>number of contacts</i><br><i>n/N (%)</i>                                  | 1 (0-2)<br>214/577 (54%)        | 1 (0-2)<br>394/702 (56%)     |
| Required nursing home care<br><i>Hours, median (IQR)</i><br><i>n/N (%)</i>                                        | 0 (0-1)<br>97/589 (16%)         | 0 (0-0)<br>91/713 (13%)      |
| Required domestic home care<br><i>Hours, median (IQR)</i><br><i>n/N (%)</i>                                       | 0 (0-0)<br>118/741 (16%)        | 0 (0-0)<br>169/941 (18%)     |
